# Supplementary material for: N-heterocyclic nitrenium-catalyzed photosynthesis of 3,3-disubstituted oxindoles from α-chloroanilides
Source: Royal Society of Chemistry journal article supplement (doi:10.1039/d4ob01738b), 2024-12-05
Supplement: d4ob01738b1.pdf [file d4ob01738b1.pdf]

## *Supporting Information*

### ***N*-Heterocyclic nitrenium catalyzed photosynthesis of 3,3-disubstituted oxindoles from $\alpha$ -chloroanilides**

Kun-Quan Chen<sup>b†</sup>, Jia Zhang<sup>a,c†</sup>, De-Qun Sun<sup>b\*</sup>, Qiang Liu<sup>c\*</sup> and Xiang-Yu Chen<sup>c\*</sup>

<sup>a</sup> School of Life Science and Engineering, Southwest University of Science and Technology, Mianyang 621010, P. R. China.

<sup>b</sup> School of Pharmacy and Medical Technology, Putian University, Putian 351100, Key Laboratory of Medical Microecology (Putian University)

<sup>c</sup> School of Chemical Sciences, University of Chinese Academy of Sciences, Beijing 100049.

E-mail: dqsun@swust.edu.cn; liuqiang@ucas.ac.cn; chenxiangyu20@ucas.ac.cn.

# Contents

|                                                |            |
|------------------------------------------------|------------|
| <b>1. General Experimental Details. ....</b>   | <b>S3</b>  |
| <b>2. Experimental procedures.....</b>         | <b>S5</b>  |
| <b>3. Mechanism studies .....</b>              | <b>S5</b>  |
| <b>4. Compound Characterization Data. ....</b> | <b>S7</b>  |
| <b>5. NMR Spectra. ....</b>                    | <b>S13</b> |
| <b>6. References. ....</b>                     | <b>S40</b> |

## 1. General Experimental Details.

Chemicals were purchased from Heowns, Innochem and Bidepharm. They were used without further purification unless otherwise noted. The  $\alpha$ -chloroanilides were prepared according to the known literatures.<sup>1-6</sup> Solvents were purified using a solvent-purification system (VSPS-8, Vigor) that contained activated alumina and molecular sieves.

Chromatographic purification of the products was performed on Mietek 200-300 mesh silica gel.

High-resolution mass spectra (HRMS) were obtained with the mass analyzer of an orbitrap. The calculated values are based on the most abundant isotope.

IR spectra were taken on a Vertex 70 spectrophotometer and reported as wave numbers ( $\text{cm}^{-1}$ ).

The GC-MS TQ8040 was used in the detection of the reaction mixture.

UV-vis absorption spectra were acquired on UV-2600 spectrophotometer (Shimadzu, Japan).

$^1\text{H}$ ,  $^{19}\text{F}$  and  $^{13}\text{C}$ - NMR spectra were recorded at ambient temperature on a JEOL JNM-LA400 Spectrometer and JEOL JNM-ECZ500R Spectrometer. The chemical shifts are reported in ppm downfield of tetramethylsilane (TMS) and referenced to residual solvent peaks resonance as the internal standard. The order of citation in parentheses is a) multiplicity (s = singlet, d = doublet, t = triplet, dd= doublet of doublet, td = triplet of doublet, m = multiplet), b) coupling constants, c) number of protons. Coupling constants (J) are reported in Hertz (Hz).

HRMS were obtained on an IonSpec FT-ICR mass spectrometer with ESI resources. The mass analysis mode of the HRMS was orbitrap.

Photochemical experiments were performed magnetically stirred in 10 mL glass tubes, sealed with a rubber septum. The tubes were irradiated with blue light (450 nm) using a LED lamp with a power output of 100 W. The distance from the light source to the irradiation vessel is 2 cm, keeping the reaction temperature at  $75\pm 5$  °C. (The purchase link of LED lamp is: <https://item.taobao.com/item.htm?spm=a1z10.5-c-s.w4002-21207510047.14.dbef5298YBVk03&id=522759747619>).

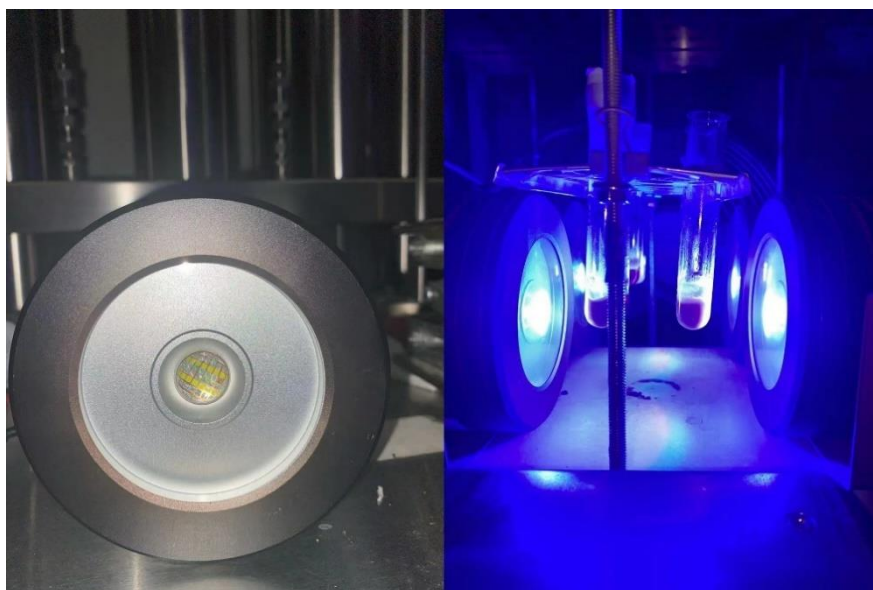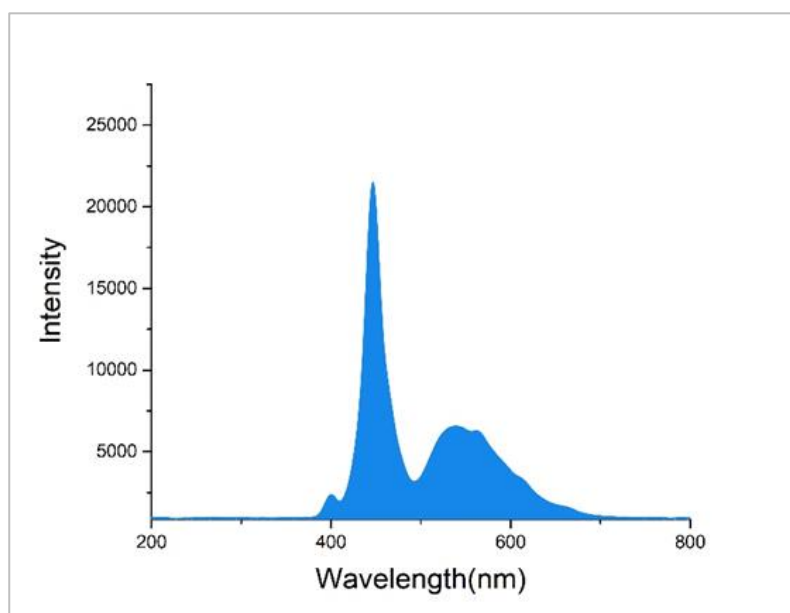

**Figure S1.** The spectrum of blue LEDs employed in the reaction.

## 2. Experimental procedures

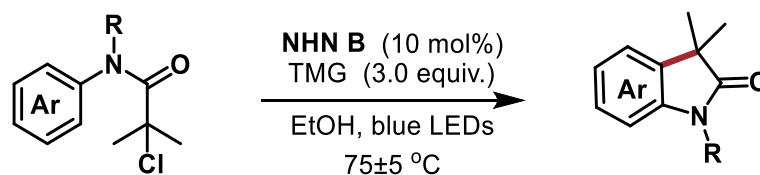

In a nitrogen-filled glovebox, a dry tube equipped with a magnetic stirring bar was charged sequentially with substrate (0.20 mmol, 1.0 equiv.), TMG (0.60 mmol, 3.0 equiv.), NHN **B** (0.01 mmol, 10% mol) and EtOH (1.0 mL). The tube was closed and removed from the glovebox. The resulting mixture was stirred at 75±5 °C under blue LED (100 W) irradiation for 12 hours. Upon completion, the solvent was removed under vacuum and the residue was subjected to silica gel chromatography using petroleum ether and ethyl acetate as eluent to afford the desired products **2-23**.

## 3. Mechanism studies

### 3.1 UV-vis studies

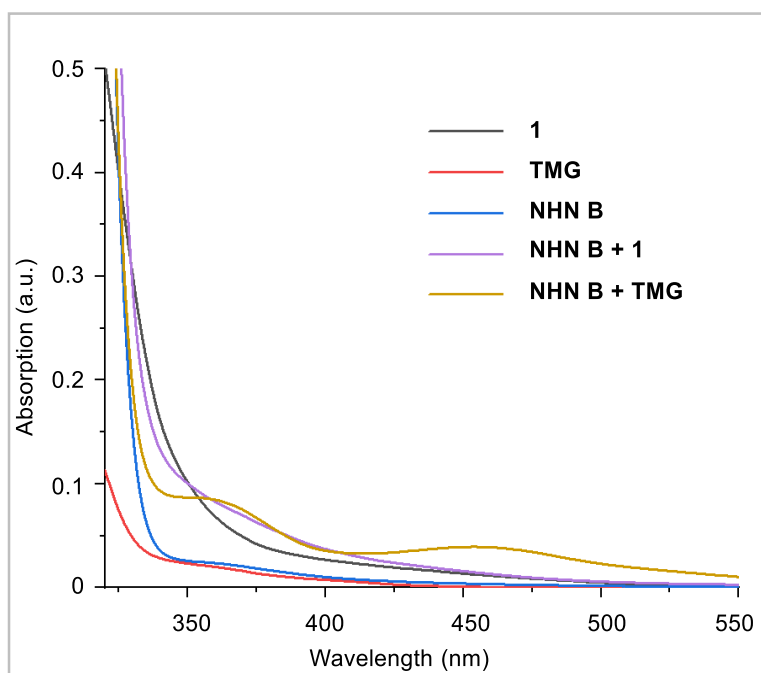

**Figure S2.** Absorption spectra of substrate **1**, TMG, NHN **B** and their mixture. The UV/vis spectra of **1** (0.2 M in EtOH), TMG (0.6 M in EtOH), NHN **B** (0.02 M in EtOH), and their mixtures.

### 3.2 Radical trapping experiment

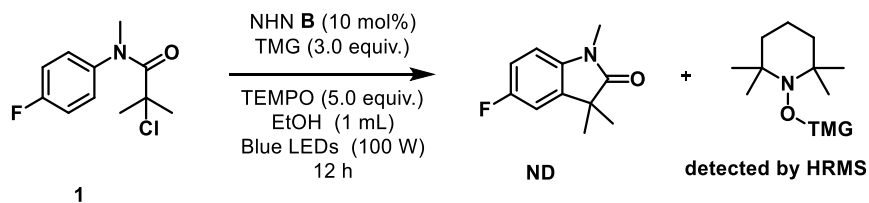

In a nitrogen-filled glovebox, a dry tube equipped with a magnetic stirring bar was charged sequentially with **1** (0.20 mmol, 1.0 equiv. ), NHN **B** (0.01 mmol, 10%mol ), TEMPO (1.0 mmol, 5.0 equiv. ) and EtOH (1.0 mL). The tube was closed and removed from the glovebox. The resulting mixture was stirred at  $75 \pm 5$  °C under blue LED (100 W) irradiation for 12 hours. The adduct of TEMPO and Tetramethylguanidine radical was detected by HRMS. **HRMS** (ESI):  $m/z$   $[M+Na]^+$  calcd for  $C_{14}H_{31}ON_4Na^+$ : 271.2492; found: 271.2482.

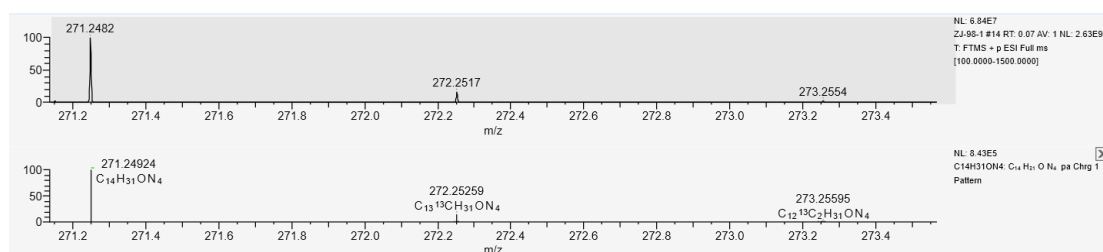

#### 4. Compound Characterization Data.

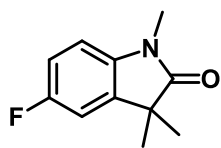

**5-fluoro-1,3,3-trimethylindolin-2-one (2):** Following the general procedure, the title product was obtained after purification by column chromatography (PE/EA = 20:1) as a light brown solid (35.9 mg, 0.186 mmol, 93%).  $^1\text{H NMR}$  (400 MHz,  $\text{CDCl}_3$ )  $\delta$  6.99 – 6.93 (m, 2H), 6.79 – 6.74 (m, 1H), 3.21 (s, 3H), 1.37 (s, 6H).  $^{13}\text{C NMR}$  (101 MHz,  $\text{CDCl}_3$ )  $\delta$  181.1, 159.5 (d,  $J$  = 240.3 Hz), 138.6, 137.6 (d,  $J$  = 7.9 Hz), 113.9 (d,  $J$  = 23.5 Hz), 110.6 (d,  $J$  = 24.5 Hz), 108.5 (d,  $J$  = 8.1 Hz), 44.8, 26.5, 24.4. These data are in agreement with those reported previously in the literature.<sup>7</sup>

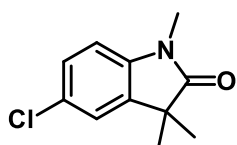

**5-chloro-1,3,3-trimethylindolin-2-one (3):** Following the general procedure, the title product was obtained after purification by column chromatography (PE/EA = 50:1) as a brownness solid (20.1 mg, 0.096 mmol, 48%).  $^1\text{H NMR}$  (400 MHz,  $\text{CDCl}_3$ )  $\delta$  7.24 (dd,  $J$  = 8.3, 2.1 Hz, 1H), 7.18 (d,  $J$  = 2.1 Hz, 1H), 6.76 (d,  $J$  = 8.2 Hz, 1H), 3.20 (s, 3H), 1.37 (s, 6H).  $^{13}\text{C NMR}$  (101 MHz,  $\text{CDCl}_3$ )  $\delta$  181.0, 141.3, 137.6, 128.0, 127.7, 123.1, 109.1, 44.6, 26.5, 24.4. These data are in agreement with those reported previously in the literature.<sup>8</sup>

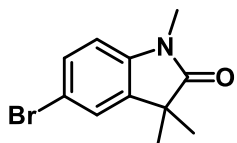

**5-bromo-1,3,3-trimethylindolin-2-one (4) :** Following the general procedure, the title product was obtained after purification by column chromatography (PE/EA = 20:1) as a colorless solid (31.4 mg, 0.124 mmol, 64%).  $^1\text{H NMR}$  (400 MHz,  $\text{CDCl}_3$ )  $\delta$  7.39 (dd,  $J$  = 8.2, 2.0 Hz, 1H), 7.31 (d,  $J$  = 2.0 Hz, 1H), 6.72 (d,  $J$  = 8.2 Hz, 1H), 3.20 (s, 3H), 1.37 (s, 6H).  $^{13}\text{C NMR}$  (151 MHz,  $\text{CDCl}_3$ )  $\delta$  180.8, 141.9, 138.1, 130.6, 125.8, 115.3, 109.6, 44.6, 26.4, 24.4. These data are in agreement with those reported previously in the literature.<sup>7</sup>

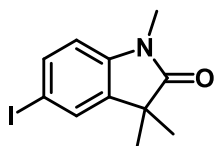

**5-iodo-1,3,3-trimethylindolin-2-one ( 5 ) :** Following the general procedure, general procedure, the title product was obtained after purification by column chromatography (PE/EA = 20:1) as a faint yellow solid (19.3 mg, 0.064 mmol, 32%).  $^1\text{H NMR}$  (400 MHz,  $\text{CDCl}_3$ )  $\delta$  7.70 – 7.43 (m, 2H), 6.63 (d,  $J$  = 8.1 Hz, 1H), 3.19 (s, 3H), 1.36 (s, 6H).  $^{13}\text{C NMR}$  (101 MHz,  $\text{CDCl}_3$ )  $\delta$  180.9, 141.8, 138.0, 130.6, 125.8, 115.3, 109.6, 44.6, 26.4, 24.4. These data are in agreement with those reported previously in the literature.<sup>9</sup>

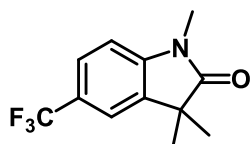

**1,3,3-trimethyl-5-(trifluoromethyl)indolin-2-one (6):** Following the general procedure, the title product was obtained after purification by column chromatography (PE/EA = 20:1) as a faint yellow oil (26.2 mg, 0.108 mmol, 54%). <sup>1</sup>H NMR (400 MHz, CDCl<sub>3</sub>) δ 7.57 – 7.53 (m, 1H), 7.44 – 7.42 (m, 1H), 6.91 (d, J = 8.2 Hz, 1H), 3.25 (s, 3H), 1.40 (s, 6H). <sup>13</sup>C NMR (101 MHz, CDCl<sub>3</sub>) δ 181.4, 145.8, 136.5, 125.7 (d, J = 4.0 Hz), 124.0 (d, J = 148.9 Hz), 119.5 (d, J = 3.8 Hz), 107.9, 44.3, 26.5, 24.4. <sup>19</sup>F NMR (376 MHz, CDCl<sub>3</sub>) δ -61.26. These data are in agreement with those reported previously in the literature.<sup>7</sup>

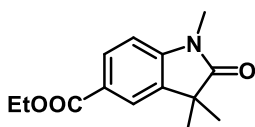

**methyl 1,3,3-trimethyl-2-oxindoline-5-carboxylate (7):** Following the general procedure, the title product was obtained after purification by column chromatography (PE/EA = 20:1) as a faint yellow solid (34.58 mg, 0.140 mmol, 70%). <sup>1</sup>H NMR (400 MHz, CDCl<sub>3</sub>) δ 8.03 (dd, J = 8.2, 1.7 Hz, 1H), 7.88 (d, J = 1.7 Hz, 1H), 6.88 (d, J = 8.2 Hz, 1H), 4.38 (q, J = 7.1 Hz, 2H), 3.25 (s, 3H), 1.44 – 1.38 (m, 9H). <sup>13</sup>C NMR (101 MHz, CDCl<sub>3</sub>) δ 181.8, 166.7, 146.9, 135.8, 130.6, 125.0, 123.7, 107.6, 61.0, 44.2, 26.6, 24.4, 14.6. These data are in agreement with those reported previously in the literature.<sup>10</sup>

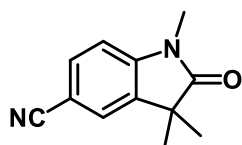

**1,3,3-trimethyl-2-oxindoline-5-carbonitrile (8):** Following the general procedure, the title product was obtained after purification by column chromatography (PE/EA = 20:1) as a white solid (15.2 mg, 0.076 mmol, 38%). <sup>1</sup>H NMR (400 MHz, CDCl<sub>3</sub>) δ 7.61 (dd, J = 8.1, 1.6 Hz, 1H), 7.45 (d, J = 1.6 Hz, 1H), 6.91 (d, J = 8.1 Hz, 1H), 3.25 (s, 3H), 1.39 (s, 6H). <sup>13</sup>C NMR (101 MHz, CDCl<sub>3</sub>) δ 181.1, 146.7, 136.9, 133.3, 125.9, 119.4, 108.6, 105.7, 44.2, 26.6, 24.3. These data are in agreement with those reported previously in the literature.<sup>10</sup>

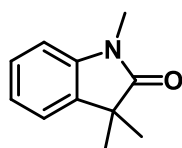

**1,3,3-trimethylindolin-2-one (9):** Following the general procedure, the title product was obtained after purification by column chromatography (PE/EA = 20:1) as a yellow oil (26.3 mg, 0.15 mmol, 75%). <sup>1</sup>H NMR (400 MHz, CDCl<sub>3</sub>) δ 7.32 – 7.16 (m, 2H), 7.09 – 7.04 (m, 1H), 6.85 (d, J = 7.7, 0.9 Hz, 1H), 3.22 (s, 3H), 1.37 (s, 6H). <sup>13</sup>C NMR (101 MHz, CDCl<sub>3</sub>) δ 181.5, 142.7, 135.9, 127.8, 122.6, 122.3, 108.1, 44.3, 26.3, 24.5. These data are in agreement with those reported previously in the literature.<sup>7</sup>



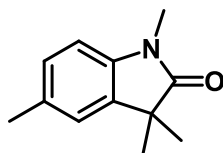

**1,3,3,5-tetramethylindolin-2-one (10):** Following the general procedure, the title product was obtained after purification by column chromatography (PE/EA = 20:1) as a yellow solid (30.2 mg, 0.160 mmol, 80%).  $^1\text{H NMR}$  (400 MHz,  $\text{CDCl}_3$ )  $\delta$  7.12 – 6.99 (m, 2H), 6.74 (d,  $J$  = 7.8 Hz, 1H), 3.20 (s, 3H), 2.35 (s, 3H), 1.36 (s, 6H).  $^{13}\text{C NMR}$  (101 MHz,  $\text{CDCl}_3$ )  $\delta$  181.5, 140.4, 136.0, 132.1, 128.0, 123.3, 107.9, 44.4, 26.4, 24.5. These data are in agreement with those reported previously in the literature.<sup>7</sup>

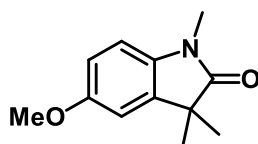

**5-methoxy-1,3,3-trimethylindolin-2-one (11):** Following the general procedure, the title product was obtained after purification by column chromatography (PE/EA = 20:1) as a yellow oil (31.2 mg, 0.152 mmol, 76%).  $^1\text{H NMR}$  (400 MHz,  $\text{CDCl}_3$ )  $\delta$  6.83 (d,  $J$  = 2.4 Hz, 1H), 6.81 – 6.72 (m, 2H), 3.81 (s, 3H), 3.19 (s, 3H), 1.36 (s, 6H).  $^{13}\text{C NMR}$  (151 MHz,  $\text{CDCl}_3$ )  $\delta$  181.2, 156.2, 137.4, 136.3, 111.7, 110.2, 108.4, 56.06, 44.8, 26.4, 24.5. These data are in agreement with those reported previously in the literature.<sup>7</sup>

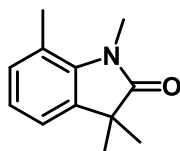

**1,3,3,7-tetramethylindolin-2-one (12):** Following the general procedure, the title product was obtained after purification by column chromatography (PE/EA = 20:1) as a yellow solid (23.4 mg, 0.104 mmol, 52%).  $^1\text{H NMR}$  (400 MHz,  $\text{CDCl}_3$ )  $\delta$  7.07 – 7.02 (m, 1H), 7.01 – 6.91 (m, 2H), 3.50 (s, 3H), 2.59 (s, 3H), 1.35 (s, 6H).  $^{13}\text{C NMR}$  (101 MHz,  $\text{CDCl}_3$ )  $\delta$  182.2, 140.5, 136.6, 131.5, 122.5, 120.3, 119.8, 43.6, 29.6, 24.9, 19.2. These data are in agreement with those reported previously in the literature.<sup>11</sup>

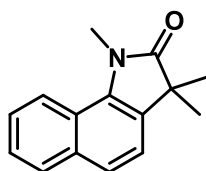

**1,3,3-trimethyl-1,3-dihydro-2H-benzo[g]indol-2-one (13):** Following the general procedure, the title product was obtained after purification by column chromatography (PE/EA = 20:1) as a faint yellow solid (38.3 mg, 0.170 mmol, 85%).  $^1\text{H NMR}$  (400 MHz,  $\text{CDCl}_3$ )  $\delta$  7.72 (d,  $J$  = 8.0 Hz, 1H), 7.52 (d,  $J$  = 7.8 Hz, 2H), 7.45 (d,  $J$  = 8.0 Hz, 2H), 6.96 (d,  $J$  = 7.6 Hz, 1H), 3.54 (s, 3H), 1.68 (s, 6H).  $^{13}\text{C NMR}$  (101 MHz,  $\text{CDCl}_3$ )  $\delta$  174.3, 140.1, 137.1, 133.5, 127.2, 126.5, 126.1, 122.5, 122.5, 119.0, 108.5, 43.5, 30.7, 29.9. These data are in agreement with those reported previously in the literature.<sup>12</sup>

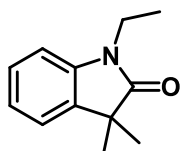

**1-ethyl-3,3-dimethylindolin-2-one (14):** Following the general procedure, the title product was obtained after purification by column chromatography (PE/EA = 20:1) as a yellow oil (23.4 mg, 0.124 mmol, 62%).  $^1\text{H NMR}$  (400 MHz,  $\text{CDCl}_3$ )  $\delta$  7.29 – 7.19 (m, 2H), 7.10 – 7.02 (m, 1H), 6.89 – 6.84 (m, 1H), 3.81 – 3.73 (m, 2H), 1.36 (s, 6H), 1.26 (t,  $J$  = 7.2 Hz, 3H).  $^{13}\text{C NMR}$  (101 MHz,  $\text{CDCl}_3$ )  $\delta$  181.1, 141.8, 136.2, 127.7, 122.6, 122.4, 108.3, 44.2, 34.7, 24.5, 12.9. These data are in agreement with those reported previously in the literature.<sup>11</sup>

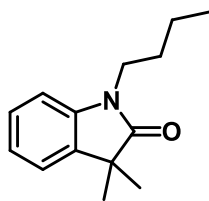

**1-butyl-3,3-dimethylindolin-2-one (15):** Following the general procedure, the title product was obtained after purification by column chromatography (PE/EA = 20:1) as a faint yellow oil (35.6 mg, 0.164 mmol, 82%).  $^1\text{H NMR}$  (400 MHz,  $\text{CDCl}_3$ )  $\delta$  7.27 – 7.19 (m, 2H), 7.05 (d, 1H), 6.86 (d,  $J$  = 7.7, 0.8 Hz, 1H), 3.71 (t,  $J$  = 7.3 Hz, 2H), 1.71 – 1.62 (m, 2H), 1.36 (s, 8H), 0.95 (t,  $J$  = 7.4 Hz, 3H).  $^{13}\text{C NMR}$  (101 MHz,  $\text{CDCl}_3$ )  $\delta$  181.4, 142.2, 136.2, 127.7, 122.5, 122.3, 108.5, 44.2, 39.7, 29.6, 24.6, 20.2, 13.9. These data are in agreement with those reported previously in the literature.<sup>13</sup>

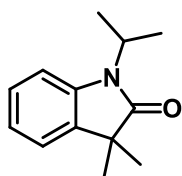

**1-isopropyl-3,3-dimethylindolin-2-one (16):** Following the general procedure, the title product was obtained after purification by column chromatography (PE/EA = 20:1) as a yellow oil (34.9 mg, 0.172 mmol, 86%).  $^1\text{H NMR}$  (400 MHz,  $\text{CDCl}_3$ )  $\delta$  7.28 – 7.19 (m, 2H), 7.06 – 7.00 (m, 2H), 4.71 – 4.62 (m, 1H), 1.49 (s, 3H), 1.47 (s, 3H), 1.35 (s, 6H).  $^{13}\text{C NMR}$  (101 MHz,  $\text{CDCl}_3$ )  $\delta$  181.2, 141.3, 136.5, 127.4, 122.6, 122.0, 110.0, 44.0, 43.5, 24.6, 19.5. These data are in agreement with those reported previously in the literature.<sup>11</sup>

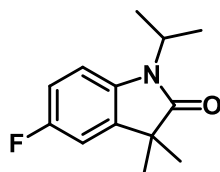

**5-fluoro-1-isopropyl-3,3-dimethylindolin-2-one (17):** Following the general procedure, the title product was obtained after purification by column chromatography (PE/EA = 20:1) as a yellow solid (34.5 mg, 0.156 mmol, 78%).  $^1\text{H NMR}$  (400 MHz,  $\text{CDCl}_3$ )  $\delta$  6.96 – 6.90 (m, 3H), 4.72 – 4.59 (m, 1H), 1.47 (s, 3H), 1.45 (s, 3H), 1.34 (s, 6H).  $^{13}\text{C NMR}$  (101 MHz,  $\text{CDCl}_3$ )  $\delta$  180.8, 159.08 (d,  $J$  = 240.4 Hz), 138.4 (d,  $J$  = 7.6 Hz), 137.1, 113.5 (d,  $J$  = 23.1 Hz), 110.8 (d,  $J$  = 24.2 Hz), 110.4 (d,  $J$  = 7.8 Hz), 44.4, 43.6, 24.5, 19.5.  $^{19}\text{F NMR}$  (376 MHz,  $\text{CDCl}_3$ )  $\delta$  -121.58. These data are in agreement with those reported previously in the literature.<sup>7</sup>

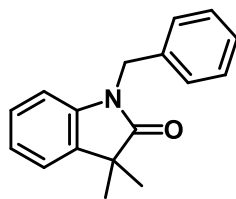

**benzyl-3,3-dimethylindolin-2-one (18):** Following the general procedure, the title product was obtained after purification by column chromatography (PE/EA = 20:1) as a faint yellow solid (42 mg, 0.166 mmol, 83%).  $^1\text{H NMR}$  (400 MHz,  $\text{CDCl}_3$ )  $\delta$  7.34 – 7.26 (m, 4H), 7.25 – 7.19 (m, 2H), 7.16 – 7.11 (m, 1H), 7.05 – 6.99 (m, 1H), 6.72 (d,  $J$  = 7.8, 0.7 Hz, 1H), 4.92 (s, 2H), 1.44 (s, 6H).  $^{13}\text{C NMR}$  (101 MHz,  $\text{CDCl}_3$ )  $\delta$  181.6, 141.8, 136.2, 135.9, 128.9, 127.7, 127.7, 127.3, 122.6, 122.5, 109.2, 44.3, 43.6, 24.7. These data are in agreement with those reported previously in the literature.<sup>12</sup>

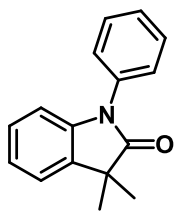

**3,3-dimethyl-1-phenylindolin-2-one (19):** Following the general procedure, the title product was obtained after purification by column chromatography (PE/EA = 20:1) as a faint yellow solid (19.0 mg, 0.08 mmol, 40%). <sup>1</sup>H NMR (400 MHz, CDCl<sub>3</sub>) δ 7.55 – 7.49 (m, 2H), 7.45 – 7.37 (m, 3H), 7.28 (d, *J* = 7.3, 1.2 Hz, 1H), 7.13 – 7.06 (m, 1H), 6.85 (d, *J* = 7.8 Hz, 1H), 1.49 (s, 6H). <sup>13</sup>C NMR (101 MHz, CDCl<sub>3</sub>) δ 180.9, 142.6, 135.8, 134.8, 129.7, 128.0, 127.7, 126.7, 123.1, 122.8, 109.5, 44.5,

24.9. These data are in agreement with those reported previously in the literature.<sup>12</sup>

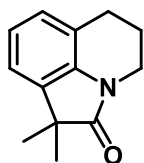

**1,1-dimethyl-5,6-dihydro-4H-pyrrolo[3,2,1-ij]quinolin-2(1H)-one (20):**

Following the general procedure, the title product was obtained after purification by column chromatography (PE/EA = 20:1) as a yellow oil (35.8 mg, 0.178 mmol, 89%). <sup>1</sup>H NMR (400 MHz, CDCl<sub>3</sub>) δ 7.06 – 7.00 (m, 2H), 6.98 – 6.90 (m, 1H), 3.74 – 3.70 (m, 2H), 2.82 – 2.76 (m, 2H), 2.06 – 1.98 (m, 2H), 1.38 (s, 6H). <sup>13</sup>C NMR (151 MHz, CDCl<sub>3</sub>) δ 180.4, 138.6, 134.5, 126.5, 122.0, 120.2, 45.6, 38.9, 24.7, 24.3, 21.3. These data are

in agreement with those reported previously in the literature.<sup>12</sup>

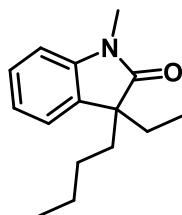

**3-butyl-3-ethyl-1-methylindolin-2-one (21) :**

Following the general procedure, the title product was obtained after purification by column chromatography (PE/EA = 20:1) as a yellow oil (21.3 mg, 0.092 mmol, 46%). <sup>1</sup>H NMR (400 MHz, CDCl<sub>3</sub>) δ 7.30 – 7.25 (m, 1H), 7.17 – 7.05 (m, 2H), 6.84 (d, *J* = 7.7 Hz, 1H), 3.22 (s, 3H), 1.98 – 1.69 (m, 4H), 1.33 – 0.87 (m,

4H), 0.76 (t, *J* = 7.3 Hz, 3H), 0.55 (t, *J* = 7.4 Hz, 3H). <sup>13</sup>C NMR (101 MHz, CDCl<sub>3</sub>) δ 180.4, 144.3, 132.5, 127.6, 122.8, 122.5, 107.8, 53.9, 37.7, 31.1, 26.5, 26.1, 23.0, 14.0, 8.7. These data are in agreement with those reported previously in the literature.<sup>14</sup>

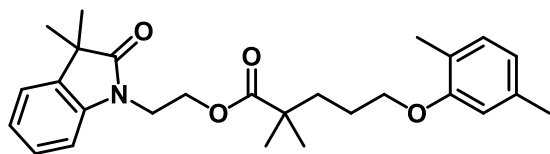

**2-(3,3-dimethyl-2-oxoindolin-1-yl)ethyl 5-(2,5-dimethylphenoxy)-2,2-dimethylpentanoate (22):**

Following the general procedure, the title product was obtained after purification by column chromatography (PE/EA = 50:1) as a yellow oil (46.3 mg, 0.106 mmol, 53%). <sup>1</sup>H NMR (400 MHz, CDCl<sub>3</sub>) δ 7.27 – 7.22 (m, 1H), 7.19 (d, *J* = 7.3, 1.3 Hz, 1H), 7.08 – 7.01 (m, 1H), 7.01 – 6.97 (m, 1H), 6.93 (d, *J* = 7.8 Hz, 1H), 6.65 (d, 1H), 6.56 (s, 1H), 4.36 – 4.27 (m, 2H), 4.00 – 3.93 (m, 2H), 3.81 – 3.75 (m, 2H), 2.31 (s, 3H), 2.14 (s, 3H), 1.63 – 1.59 (m, 4H), 1.35 (s, 6H), 1.12 (s, 6H). <sup>13</sup>C NMR (101 MHz, CDCl<sub>3</sub>) δ 181.5, 177.8, 156.98, 141.9, 136.5, 135.9, 130.4, 127.7, 123.6, 122.7, 122.6, 120.8, 112.0, 108.5, 67.8, 61.4, 44.1, 42.1, 38.9, 37.0, 25.1, 24.5, 21.5, 15.9. IR (ART): 2968, 2924, 1713, 1612, 1458, 1352, 1263, 1189, 1129 cm<sup>-1</sup>. HRMS (ESI): *m/z* [M+H]<sup>+</sup> calcd for C<sub>27</sub>H<sub>36</sub>O<sub>4</sub>N<sup>+</sup>: 438.2639; found: 438.2626.

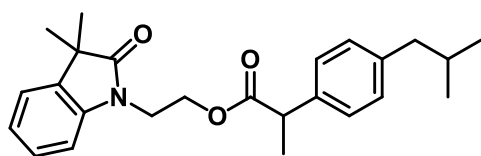

**2-(3,3-dimethyl-2-oxoindolin-1-yl)ethyl 2-(4-isobutylphenyl)propanoate (23):** Following the general procedure, the title product was obtained after purification by column chromatography (PE/EA

= 20:1) as a faint yellow oil (42 mg, 0.068 mmol, 32%). **<sup>1</sup>H NMR** (400 MHz, CDCl<sub>3</sub>) δ 7.24 – 7.18 (m, 2H), 7.11 – 6.96 (m, 5H), 6.85 (d, *J* = 7.8 Hz, 1H), 4.45 – 4.18 (m, 2H), 4.04 – 3.83 (m, 2H), 3.63 – 3.55 (m, 1H), 2.41 (d, *J* = 7.2 Hz, 2H), 1.92 – 1.75 (m, 1H), 1.39 (d, *J* = 7.2 Hz, 3H), 1.33 (d, *J* = 6.3 Hz, 6H), 0.88 (d, *J* = 6.6 Hz, 6H). **<sup>13</sup>C NMR** (151 MHz, CDCl<sub>3</sub>) δ 181.6, 174.7, 142.0, 140.7, 137.5, 135.9, 129.5, 127.7, 127.3, 122.6, 122.5, 108.5, 61.8, 45.2, 44.1, 38.9, 30.3, 24.5, 22.5, 18.4, 1.2. **IR** (ART): 2967, 2930, 1709, 1612, 1487, 1458, 1383, 1353, 1170, 1074, 926, 761, 697 cm<sup>-1</sup>. **HRMS** (ESI): *m/z* [M+H]<sup>+</sup> calcd for C<sub>27</sub>H<sub>27</sub>O<sub>3</sub>NF<sup>+</sup>: 432.1970; found: 432.1959.

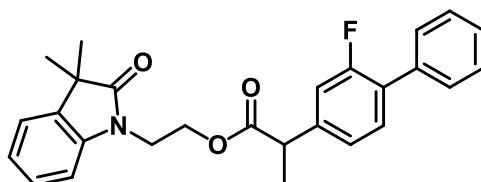

**2-(3,3-dimethyl-2-oxoindolin-1-yl)ethyl 2-(2-fluoro-[1,1'-biphenyl]-4-yl)propanoate (24):**

Following the general procedure, the title product was obtained after purification by column

chromatography (PE/EA = 20:1) as a faint yellow oil (29.3 mg, 0.166 mmol, 34%). **<sup>1</sup>H NMR** (400 MHz, CDCl<sub>3</sub>) δ 7.53 – 7.28 (m, 6H), 7.25 – 7.17 (m, 2H), 7.09 – 6.93 (m, 3H), 6.85 (d, *J* = 7.8 Hz, 1H), 4.47 – 4.26 (m, 2H), 4.07 – 3.88 (m, 2H), 3.70 – 3.60 (m, 1H), 1.44 (d, *J* = 7.2 Hz, 3H), 1.33 (d, *J* = 7.2 Hz, 6H). **<sup>13</sup>C NMR** (151 MHz, CDCl<sub>3</sub>) δ 181.6, 173.9, 159.7 (d, *J* = 248.2 Hz), 141.9, 141.5 (d, *J* = 7.8 Hz), 135.9, 135.6, 129.1 (d, *J* = 2.9 Hz), 128.6, 127.8 (d, *J* = 15.3 Hz), 123.7 (d, *J* = 3.5 Hz), 122.7 (d, *J* = 12.2 Hz), 115.4 (d, *J* = 23.5 Hz), 108.4, 62.1, 45.1, 44.1, 38.9, 24.5, 18.3. **<sup>19</sup>F NMR** (376 MHz, CDCl<sub>3</sub>) δ -117.4. **IR** (ART): 2954, 2867, 1710, 1612, 1459, 1458, 1382, 1352, 1198, 1155, 1120, 1072, 1019, 944, 848, 755, 696 cm<sup>-1</sup>. **HRMS** (ESI): *m/z* [M+H]<sup>+</sup> calcd for C<sub>25</sub>H<sub>32</sub>O<sub>3</sub>N<sup>+</sup>: 394.2377; found: 394.2365.

## 5. NMR Spectra.

$^1\text{H}$  NMR of compound **2** (400 MHz in  $\text{CDCl}_3$ )

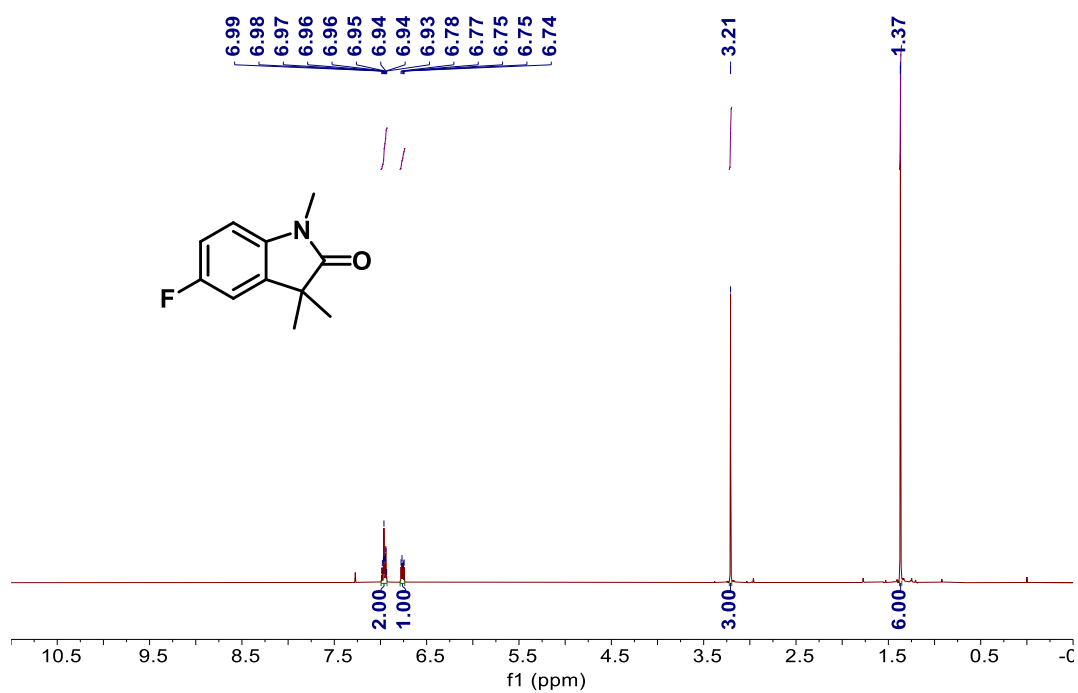

$^{13}\text{C}$  NMR of compound **2** (101 MHz in  $\text{CDCl}_3$ )

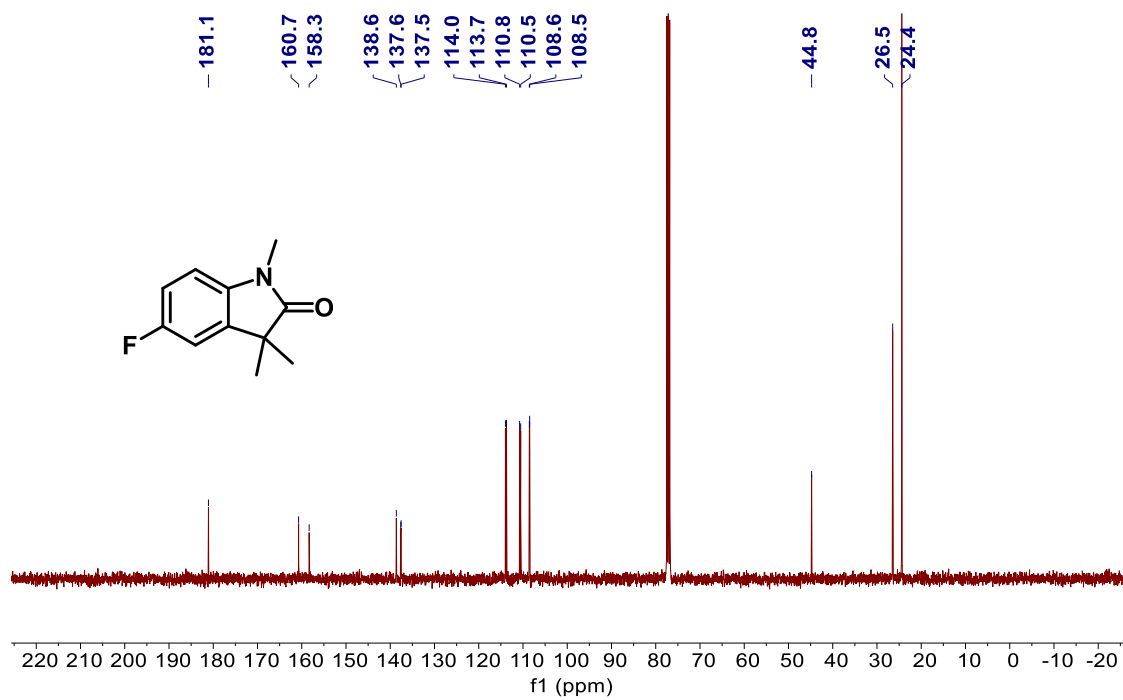

**$^{19}\text{F}$  NMR** of compound **2** (565 MHz in  $\text{CDCl}_3$ )

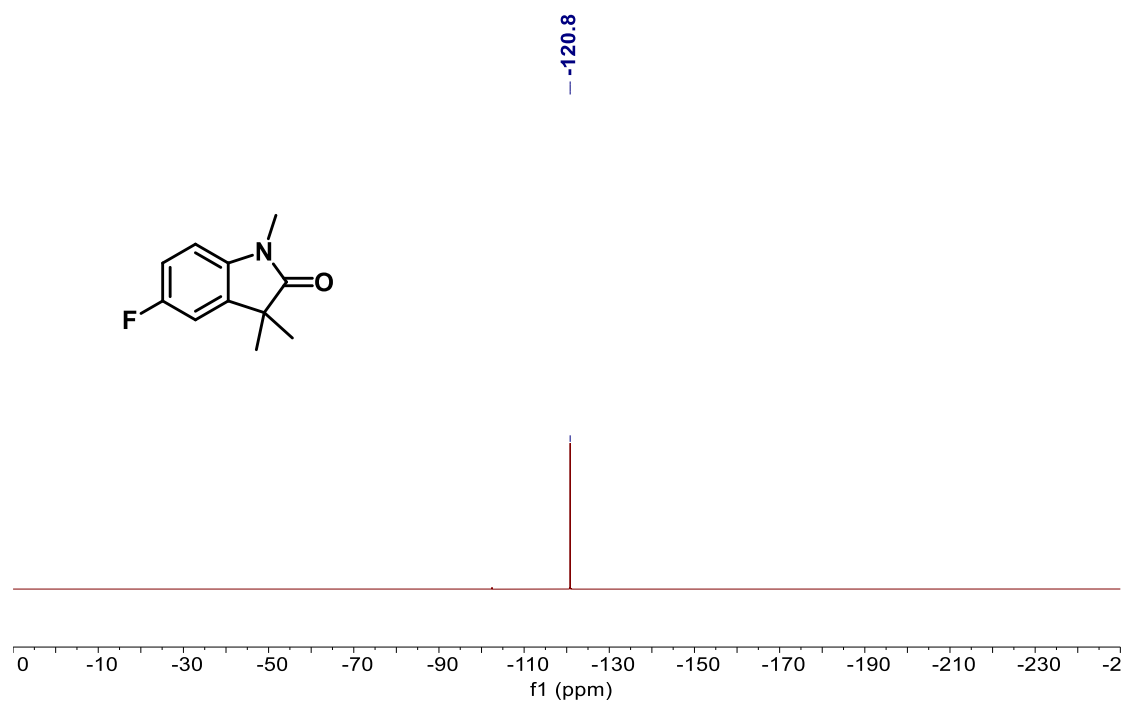

**<sup>1</sup>H NMR** of compound **3** (400 MHz in CDCl<sub>3</sub>)

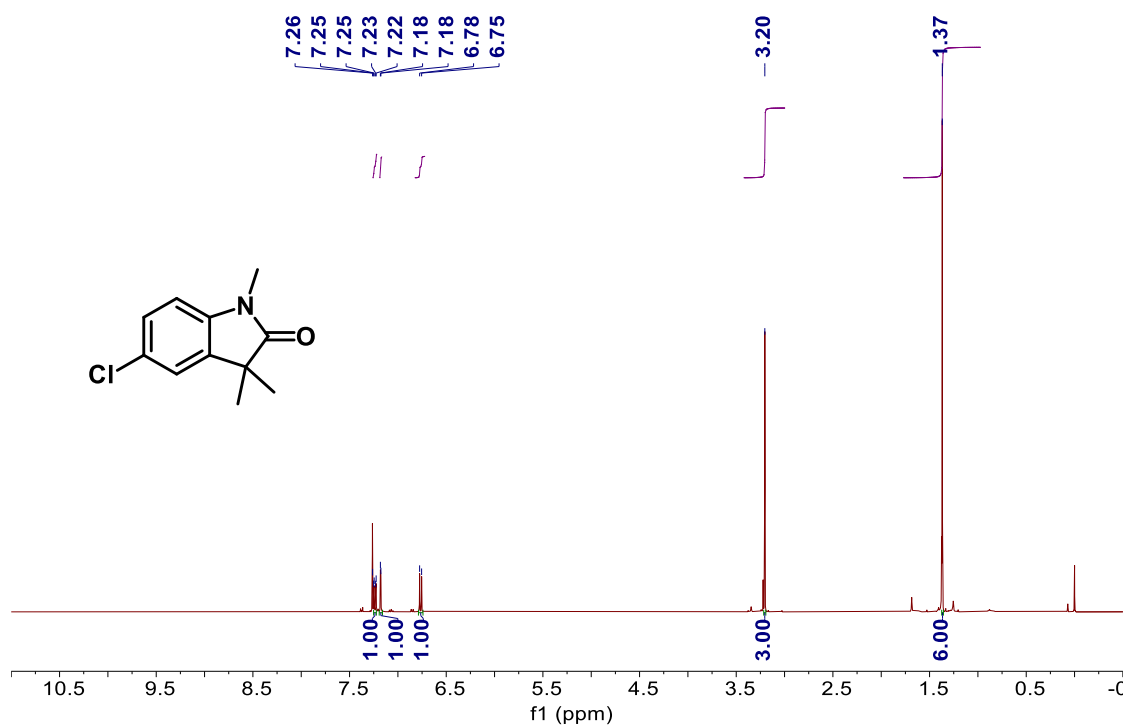

**<sup>13</sup>C NMR** of compound **3** (101 MHz in CDCl<sub>3</sub>)

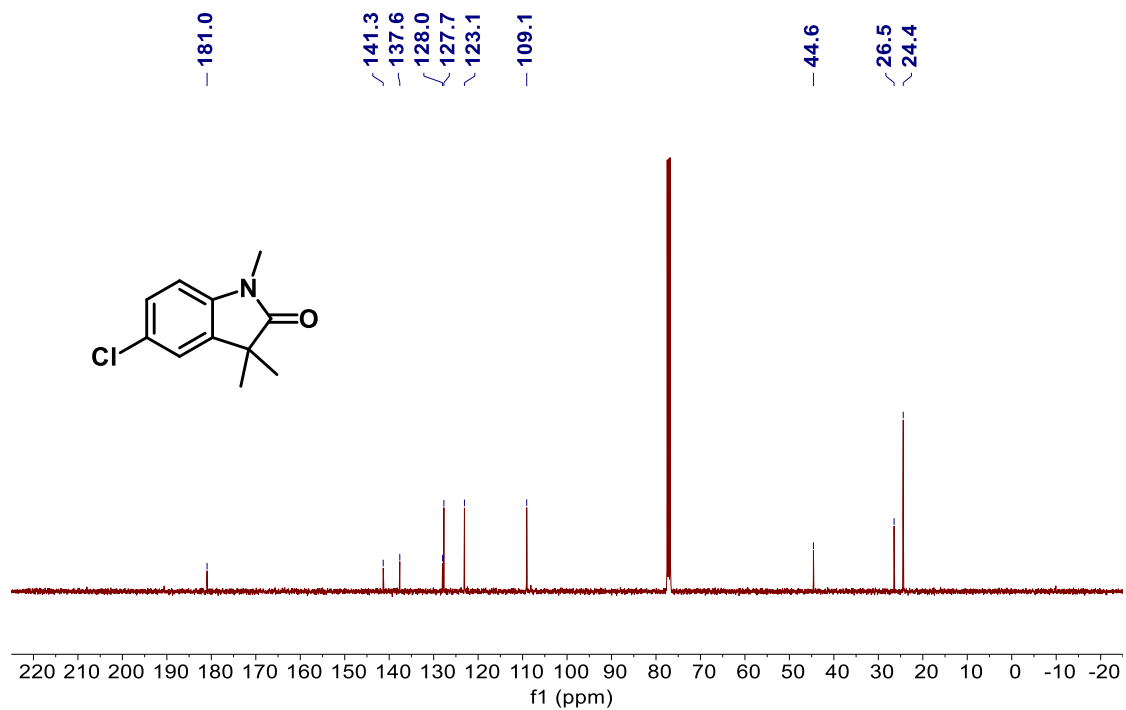

<sup>1</sup>H NMR of compound **4** (400 MHz in CDCl<sub>3</sub>)

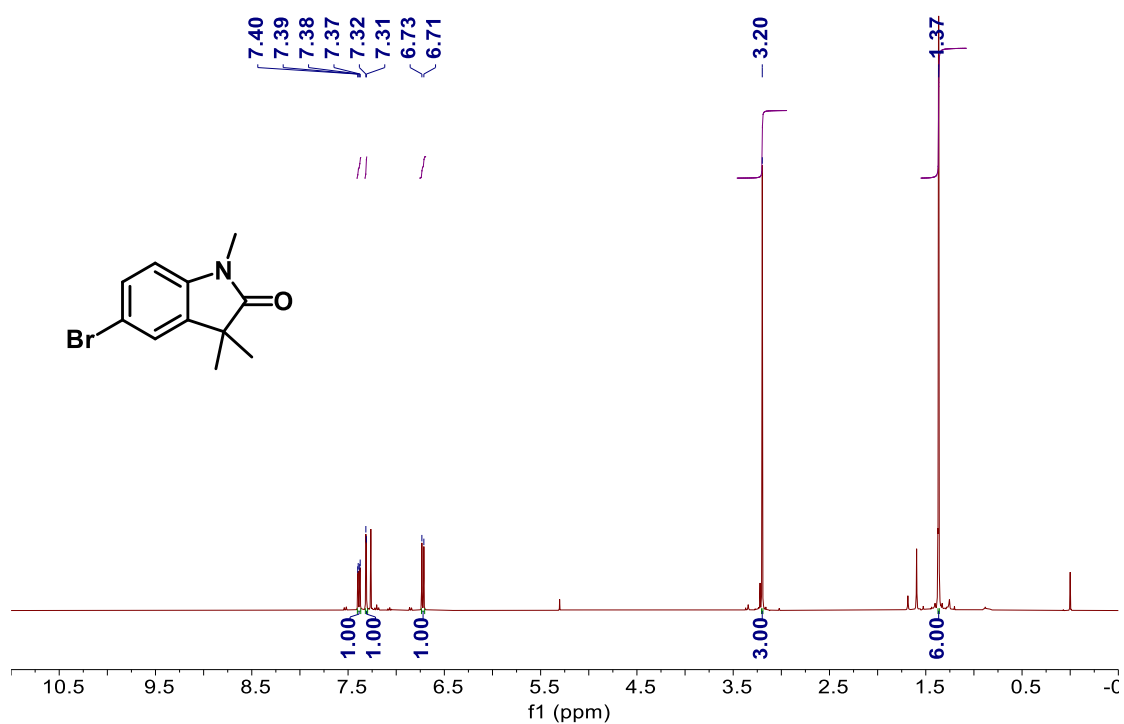

<sup>13</sup>C NMR of compound **4** (151 MHz in CDCl<sub>3</sub>)

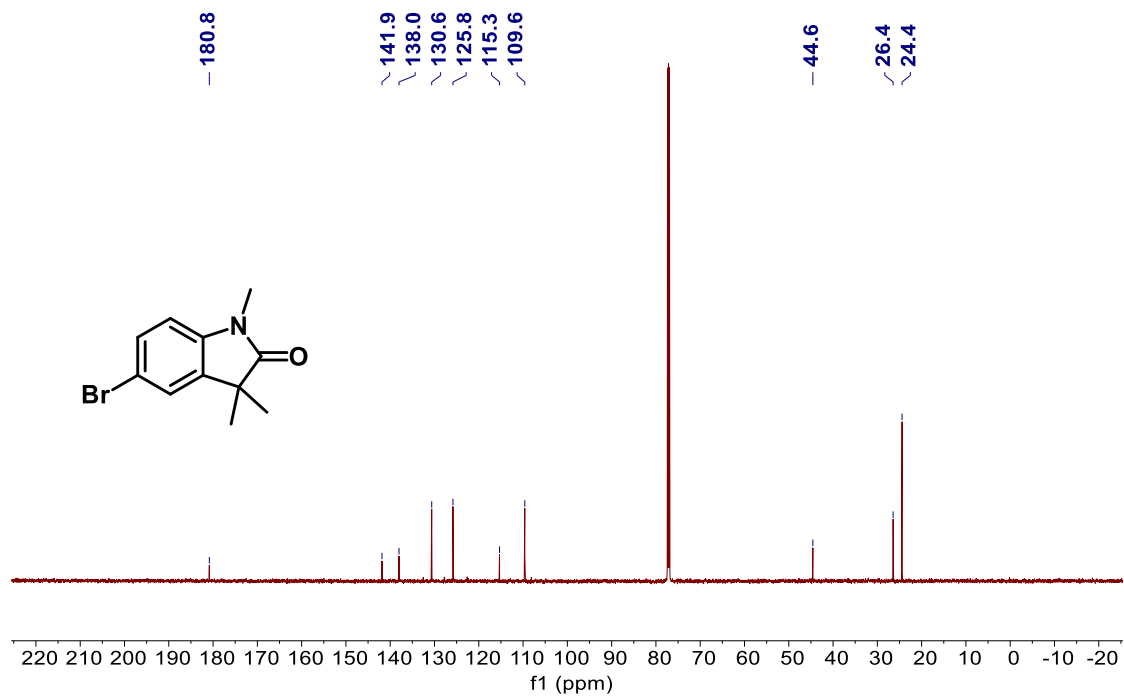



**<sup>1</sup>H NMR** of compound **5** (400 MHz in CDCl<sub>3</sub>)

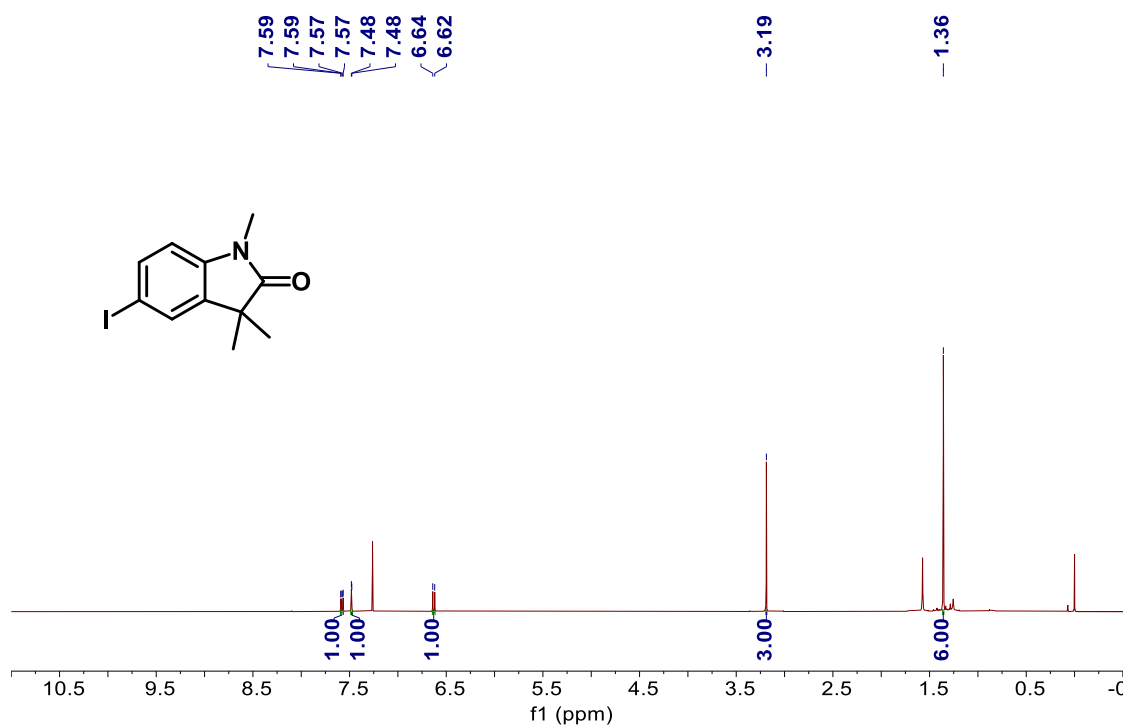

**<sup>13</sup>C NMR** of compound **5** (151 MHz in CDCl<sub>3</sub>)

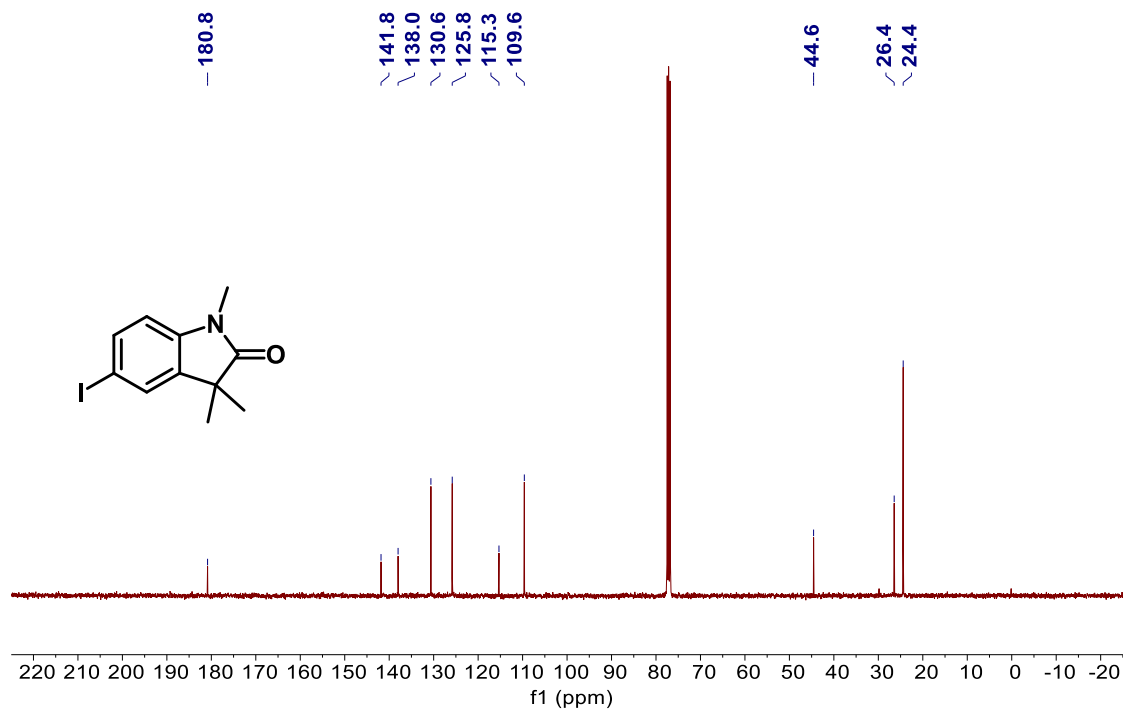

**<sup>1</sup>H NMR** of compound **6** (400 MHz in CDCl<sub>3</sub>)

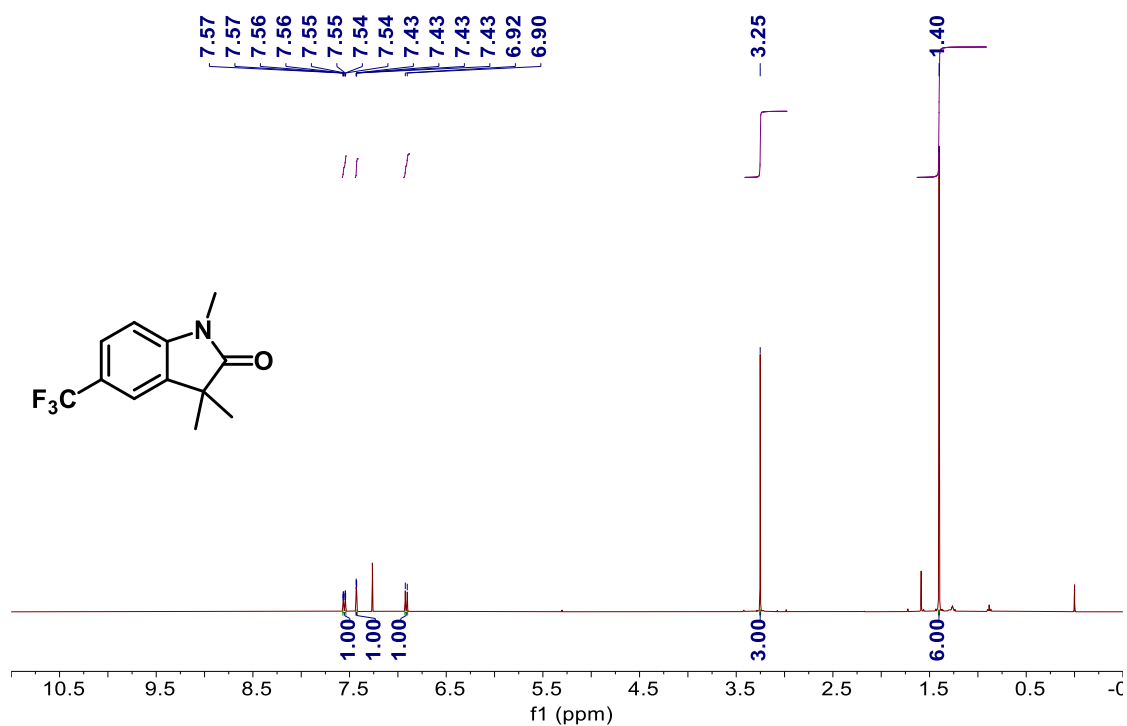

**<sup>13</sup>C NMR** of compound **6** (101 MHz in CDCl<sub>3</sub>)

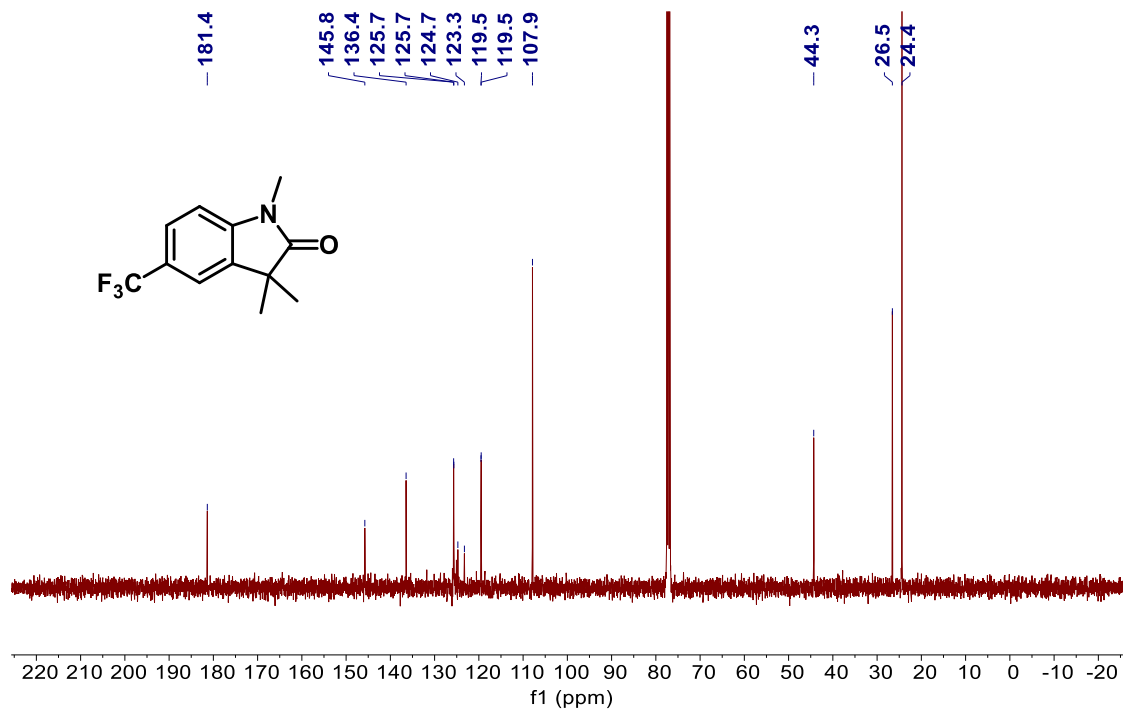

**<sup>19</sup>F NMR** of compound **6** (101 MHz in CDCl<sub>3</sub>)

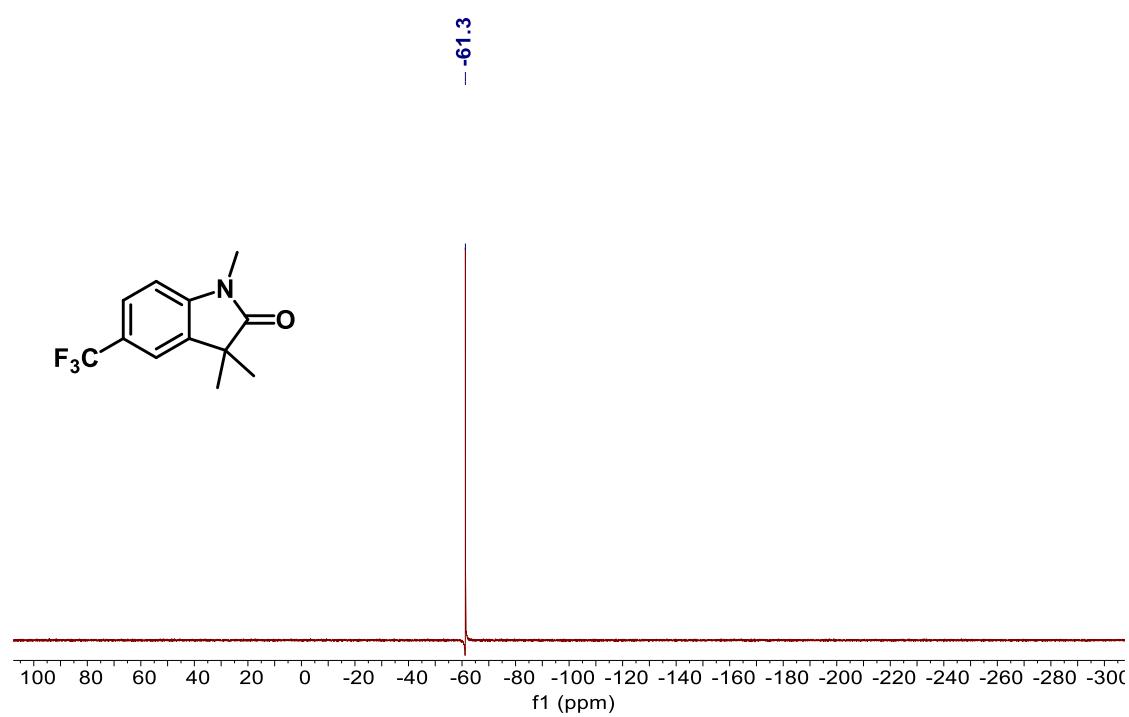

**<sup>1</sup>H NMR** of compound **7** (400 MHz in CDCl<sub>3</sub>)

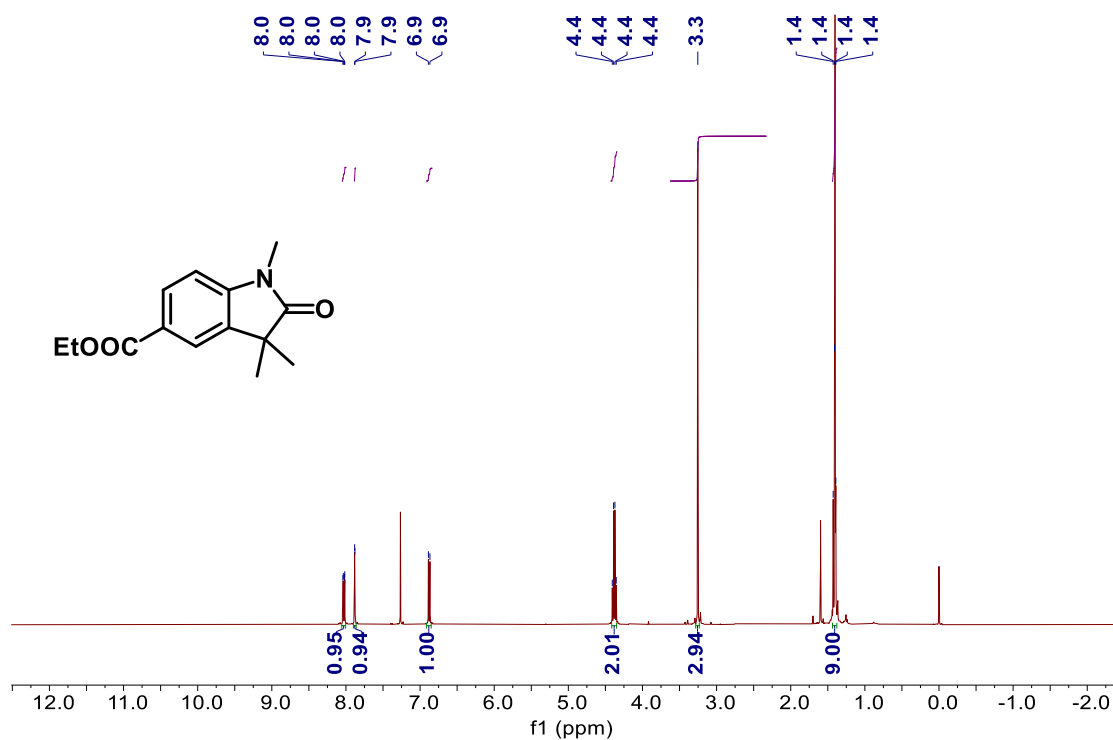

**<sup>13</sup>C NMR** of compound **7** (101 MHz in CDCl<sub>3</sub>)

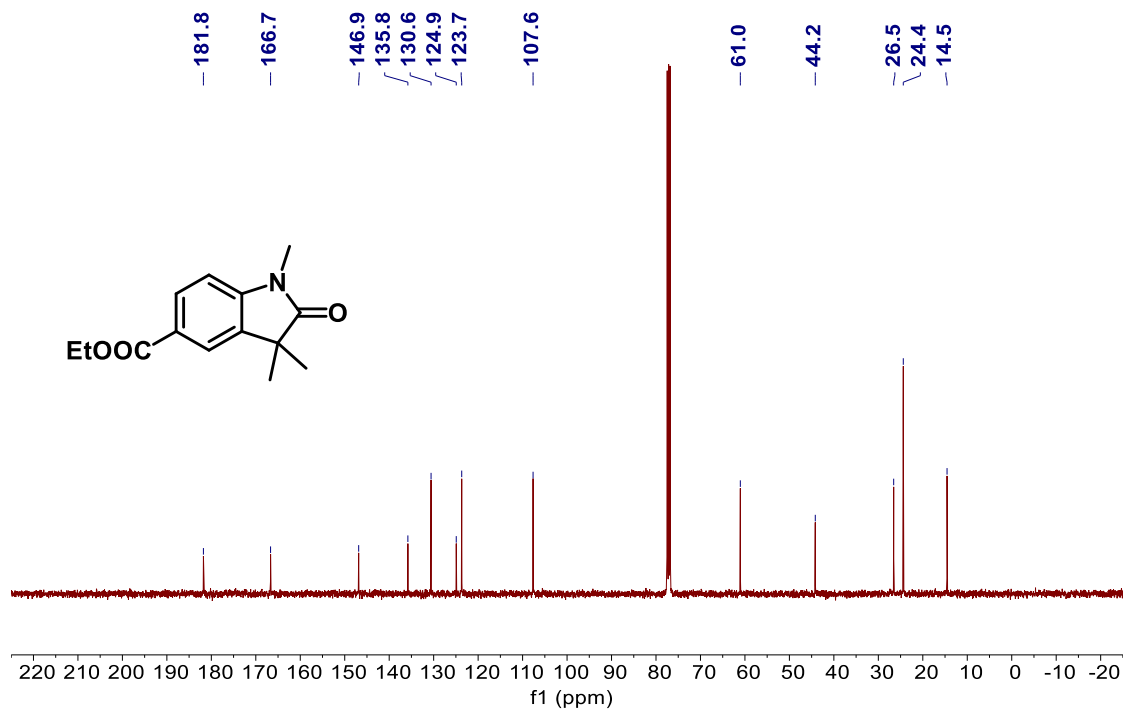

**<sup>1</sup>H NMR** of compound **8** (400 MHz in CDCl<sub>3</sub>)

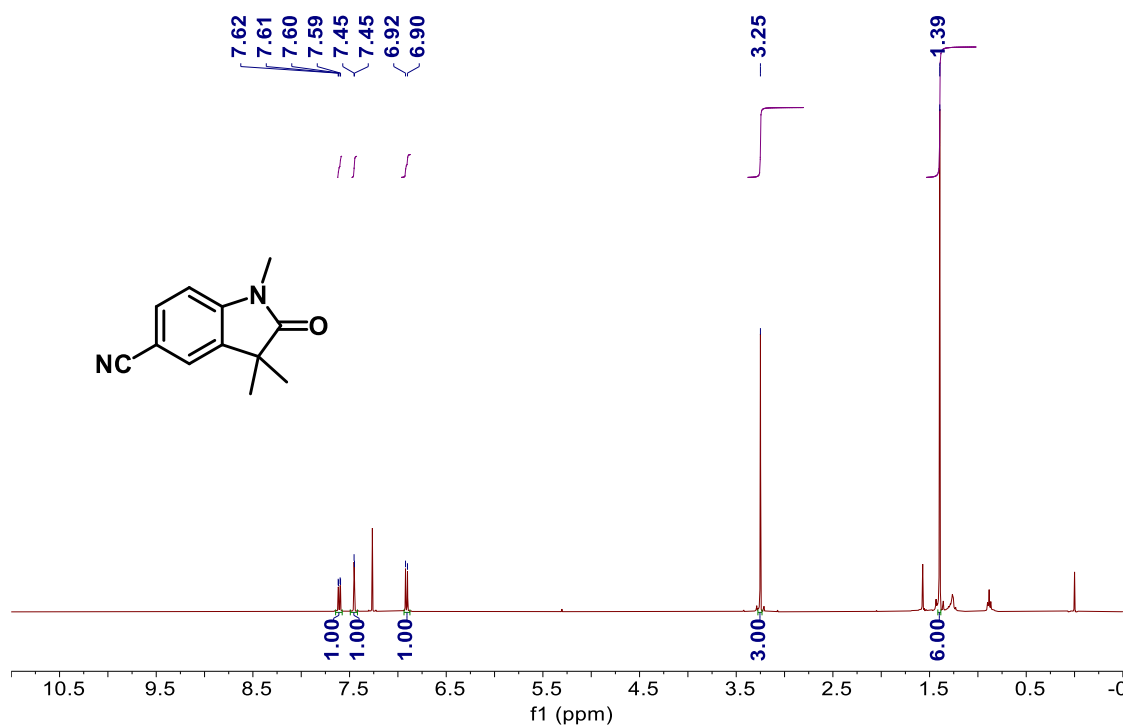

**<sup>13</sup>C NMR** of compound **8** (101 MHz in CDCl<sub>3</sub>)

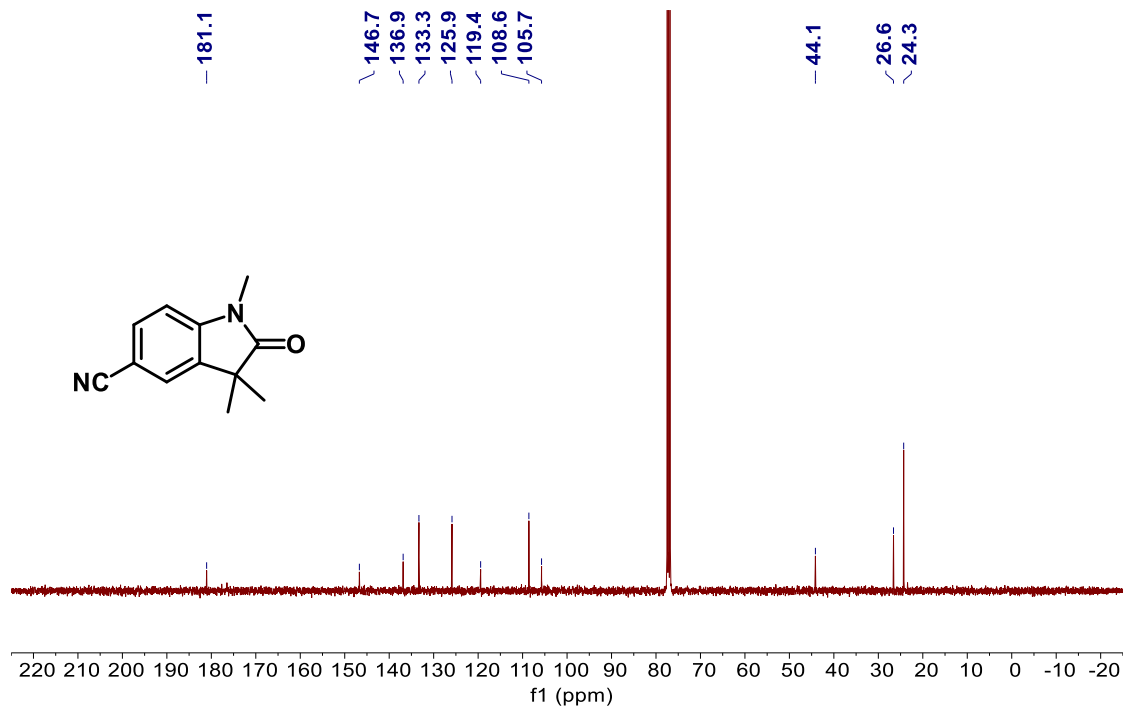

**<sup>1</sup>H NMR** of compound **9** (400 MHz in CDCl<sub>3</sub>)

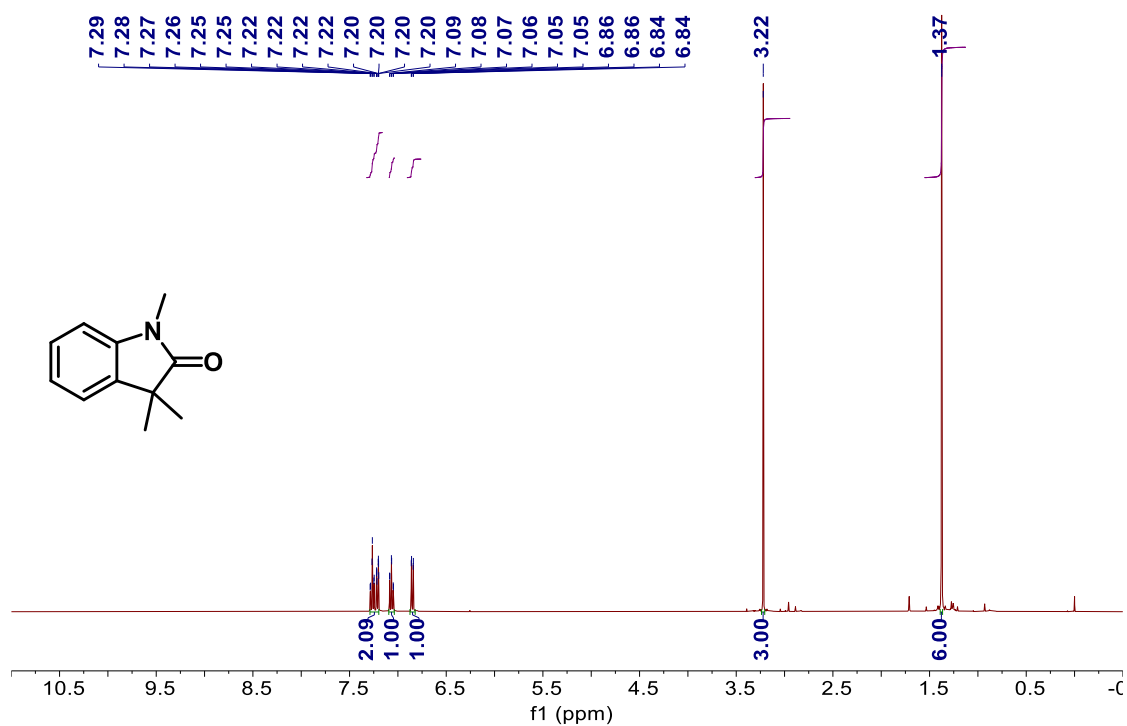

**<sup>13</sup>C NMR** of compound **9** (101 MHz in CDCl<sub>3</sub>)

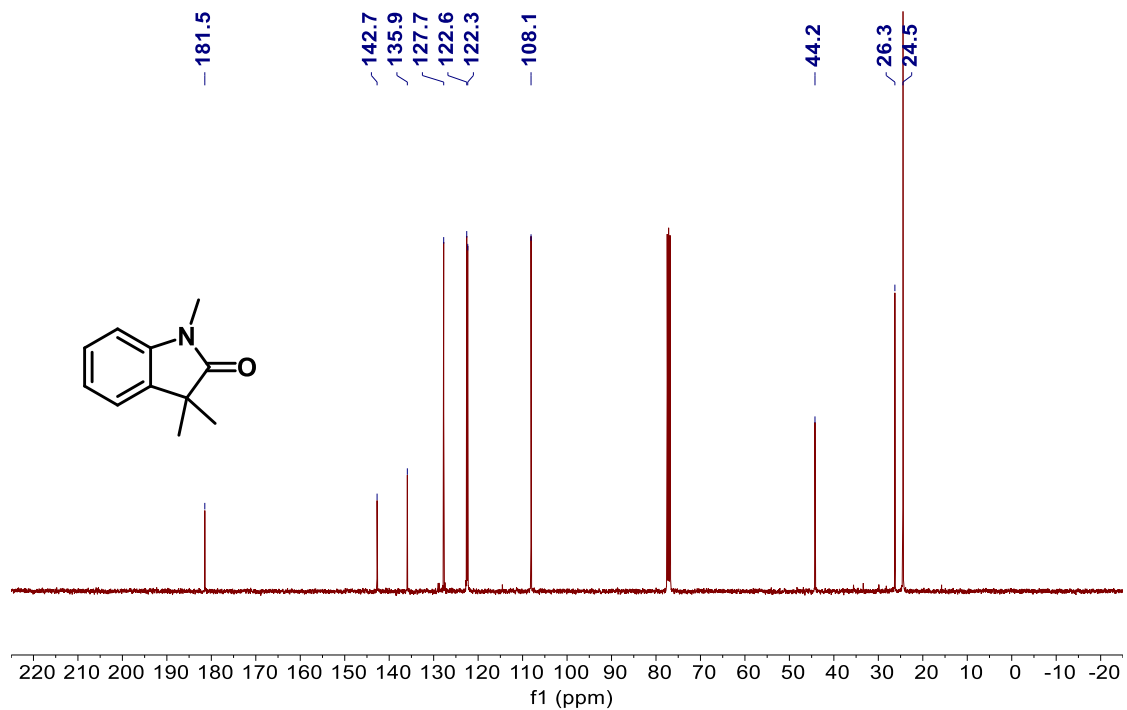

**<sup>1</sup>H NMR** of compound **10** (400 MHz in CDCl<sub>3</sub>)

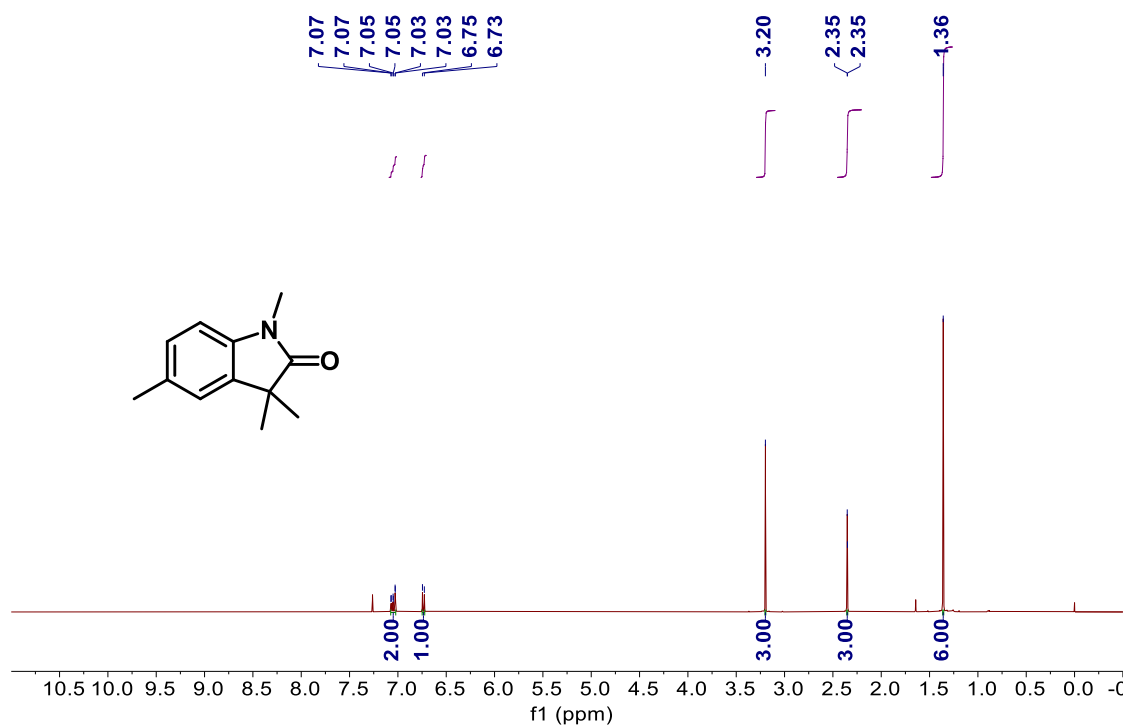

**<sup>13</sup>C NMR** of compound **10** (101 MHz in CDCl<sub>3</sub>)

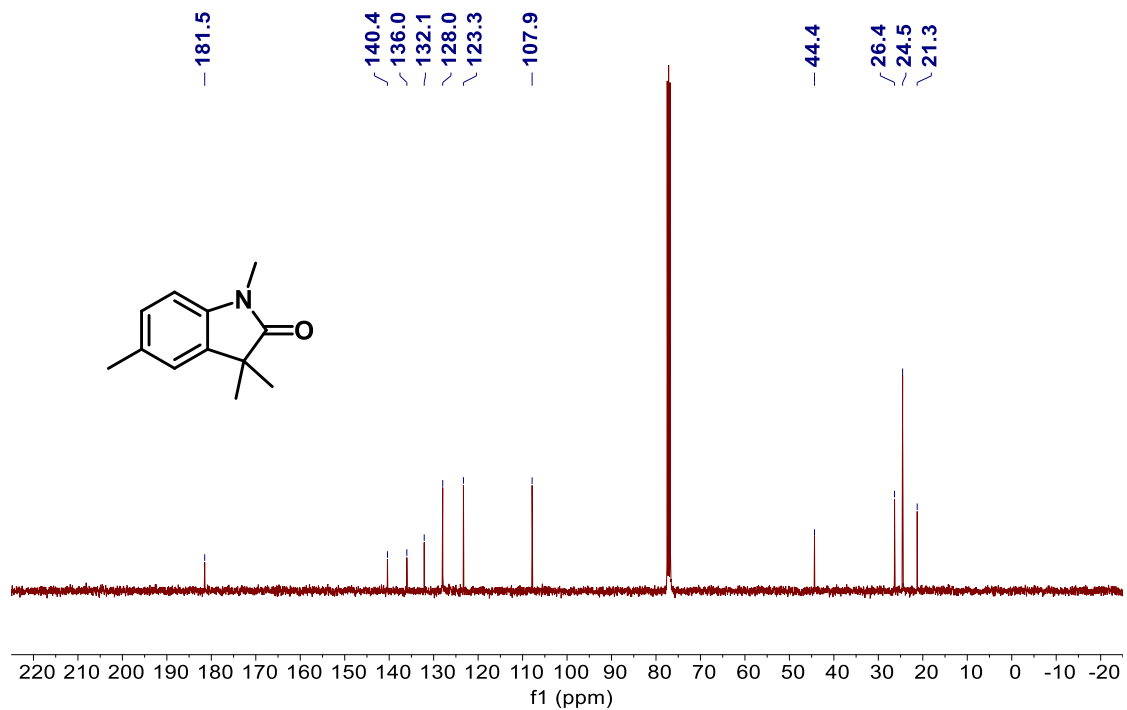

$^1\text{H}$  NMR of compound **11** (500 MHz in  $\text{CDCl}_3$ )

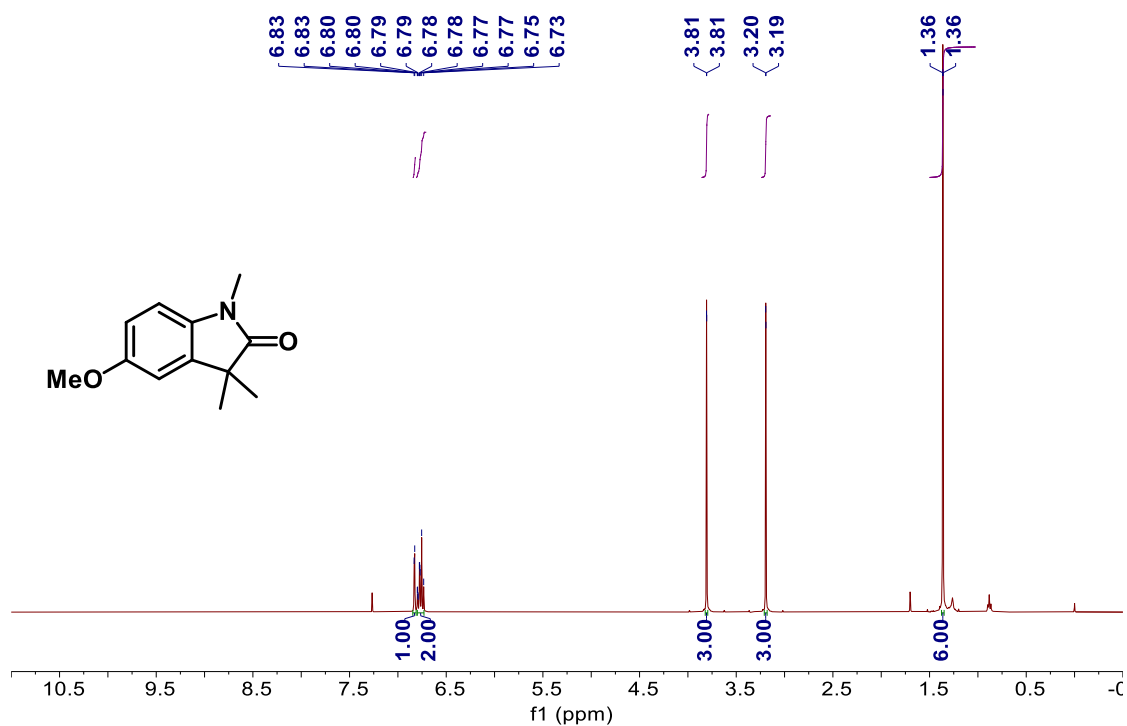

$^{13}\text{C}$  NMR of compound **11** (151 MHz in  $\text{CDCl}_3$ )

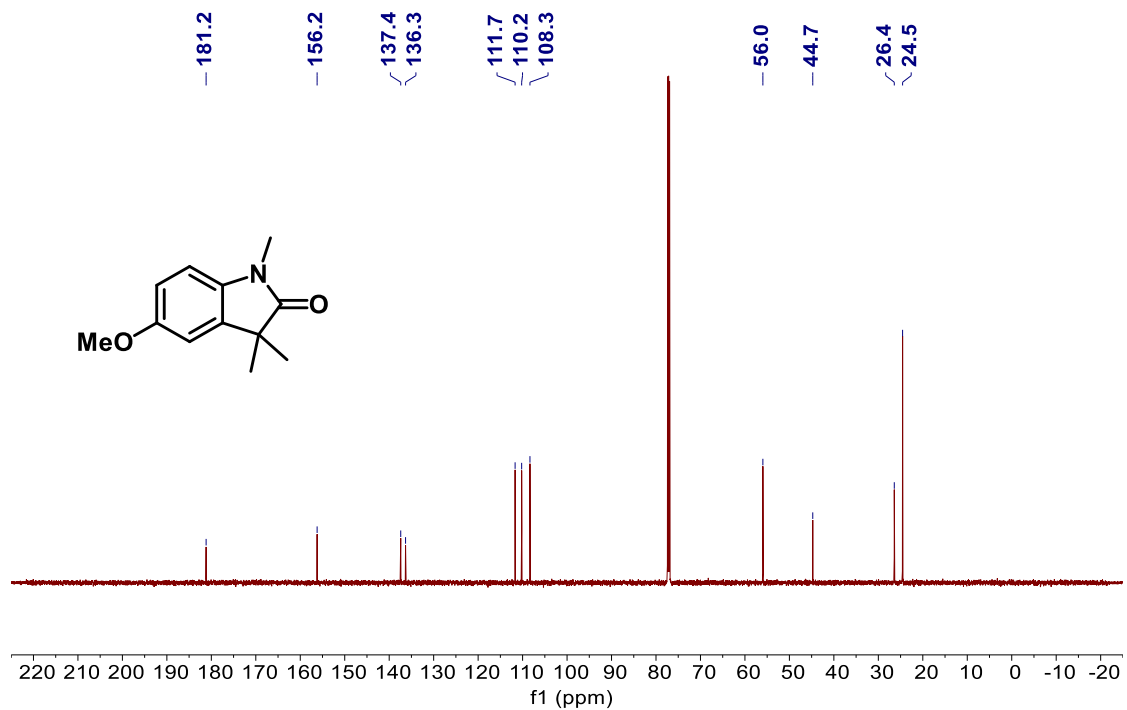



**<sup>1</sup>H NMR** of compound **12** (400 MHz in CDCl<sub>3</sub>)

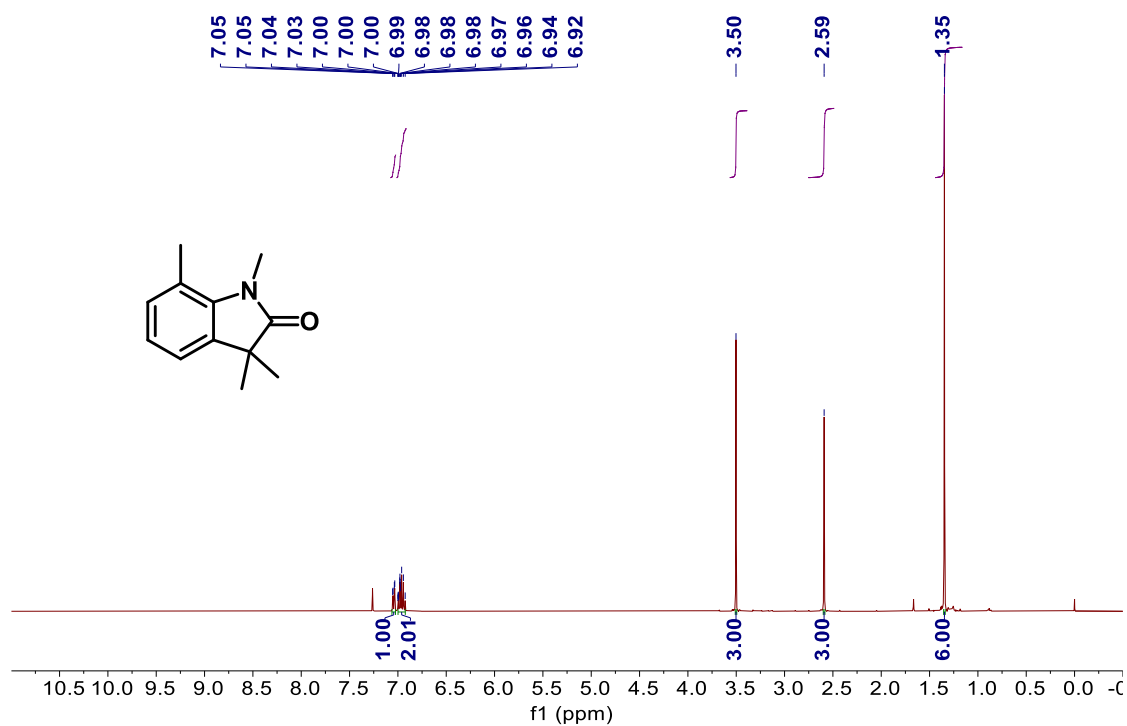

**<sup>13</sup>C NMR** of compound **12** (101 MHz in CDCl<sub>3</sub>)

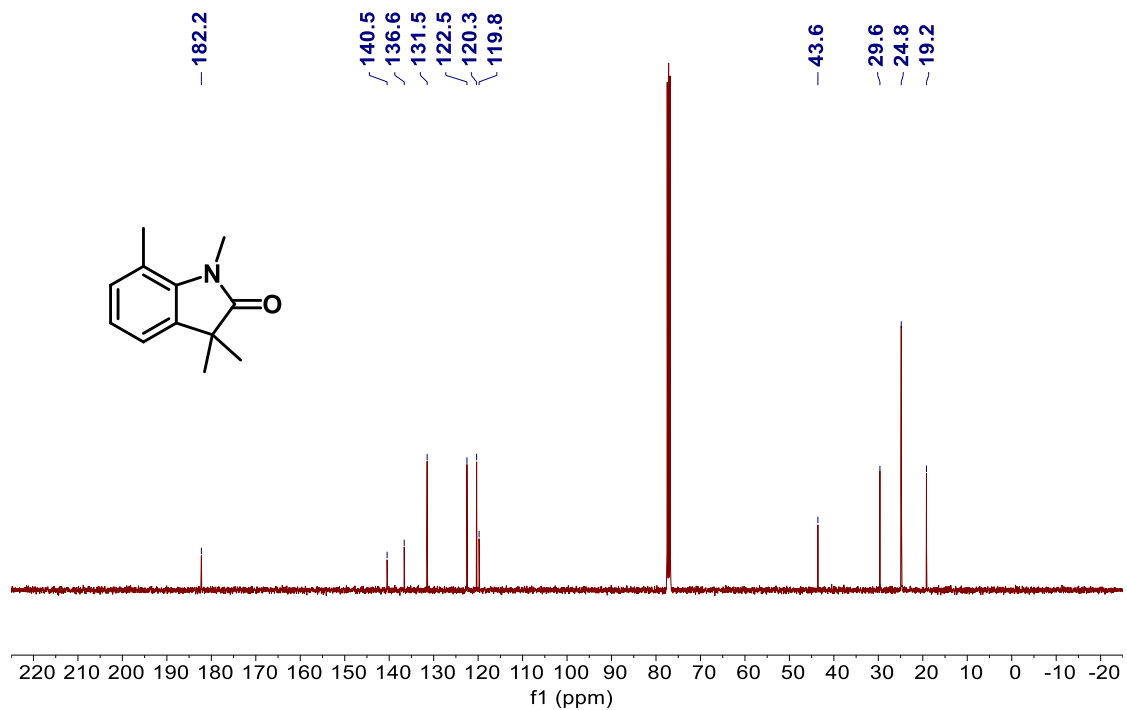

<sup>1</sup>H NMR of compound **13** (400 MHz in CDCl<sub>3</sub>)

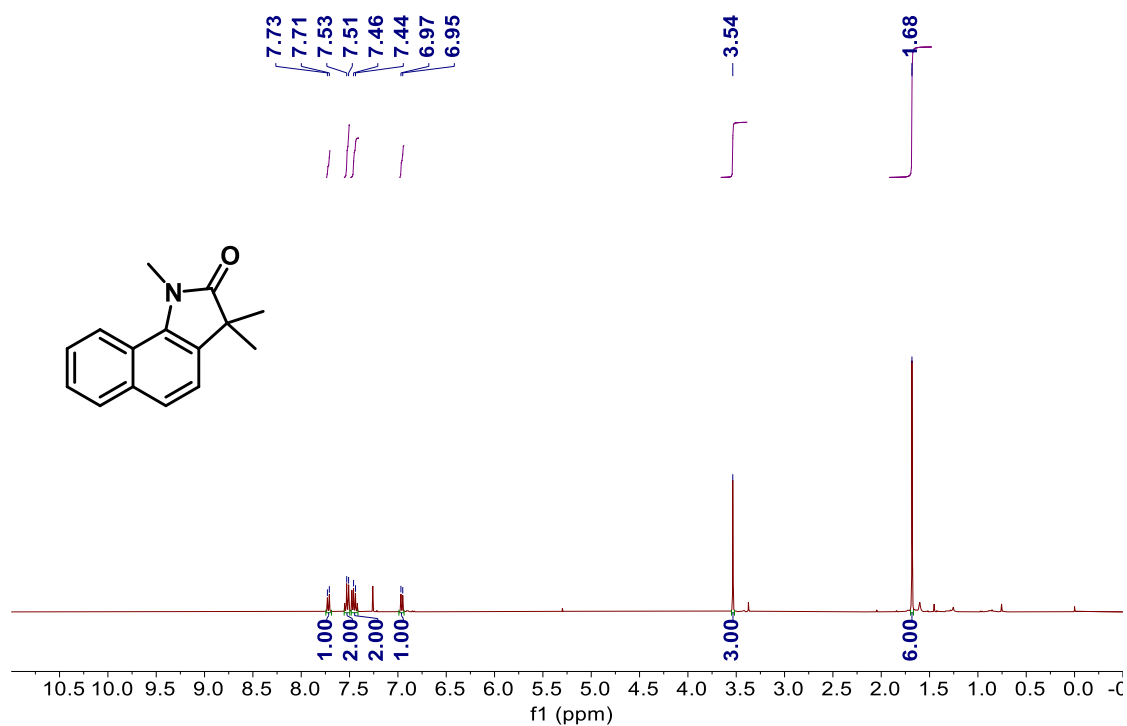

<sup>13</sup>C NMR of compound **13** (101 MHz in CDCl<sub>3</sub>)

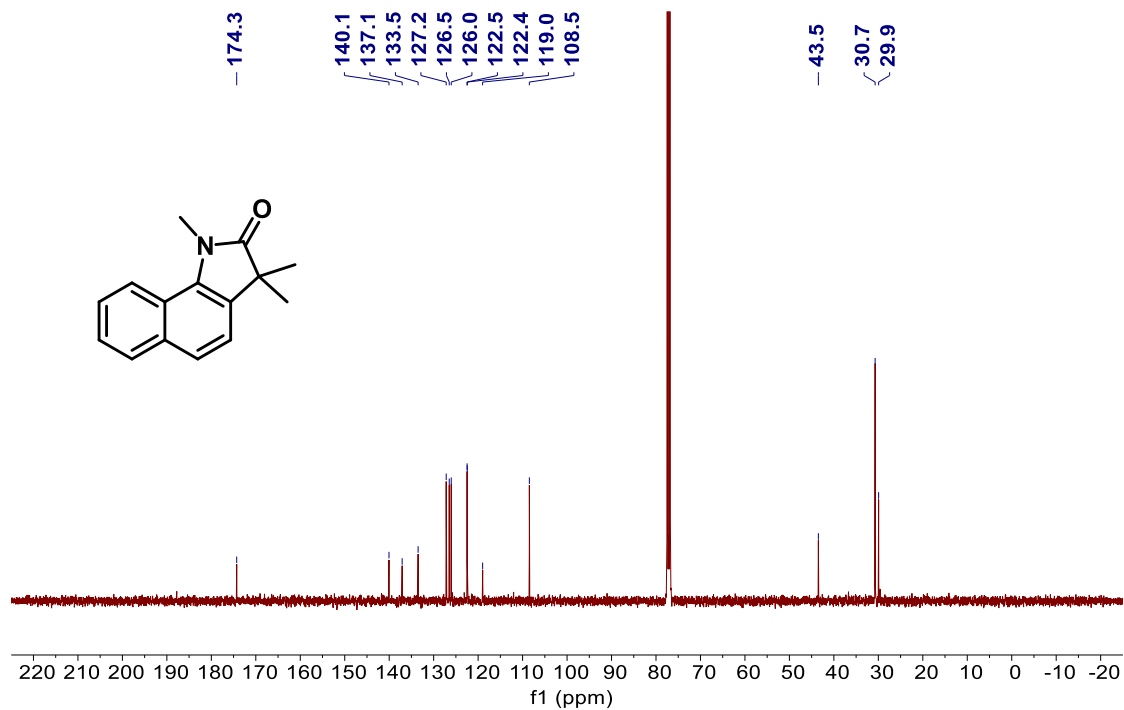

<sup>1</sup>H NMR of compound **14** (400 MHz in CDCl<sub>3</sub>)

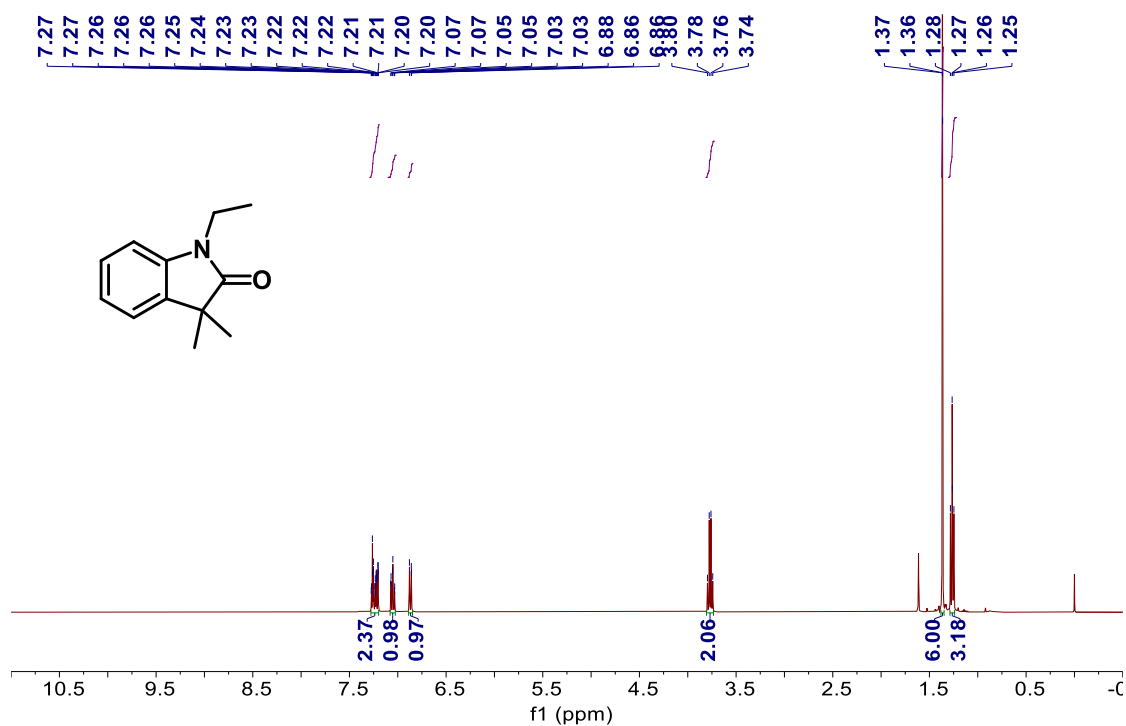

<sup>13</sup>C NMR of compound **14** (101 MHz in CDCl<sub>3</sub>)

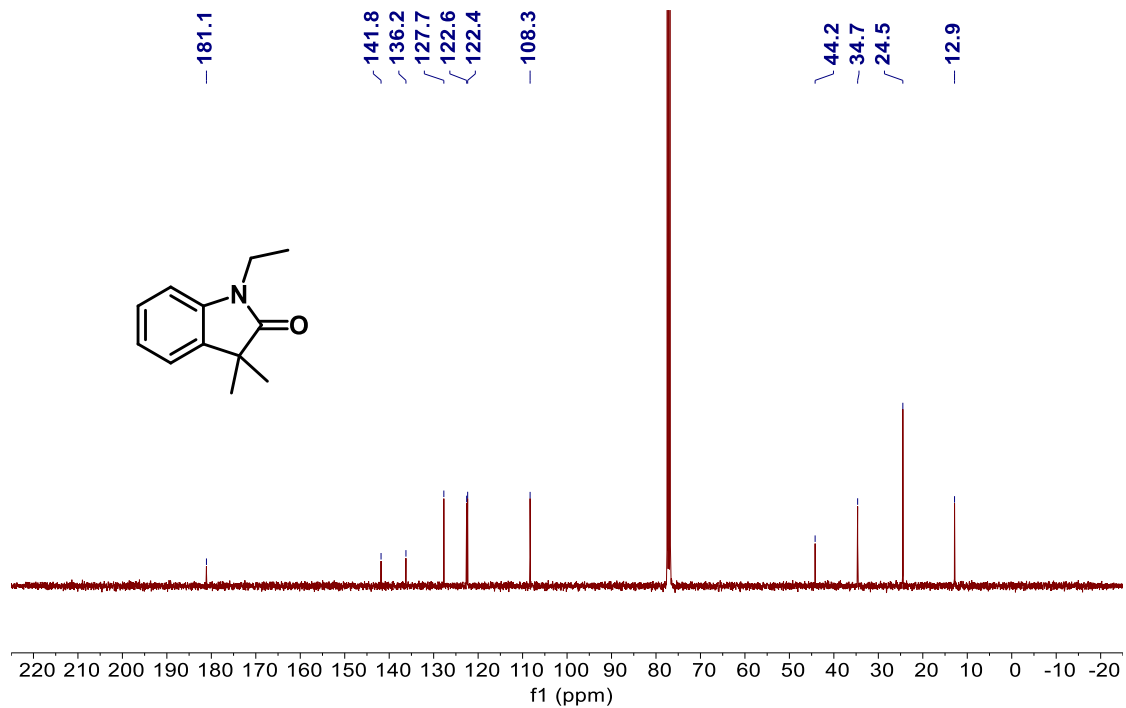

<sup>1</sup>H NMR of compound **15** (400 MHz in CDCl<sub>3</sub>)

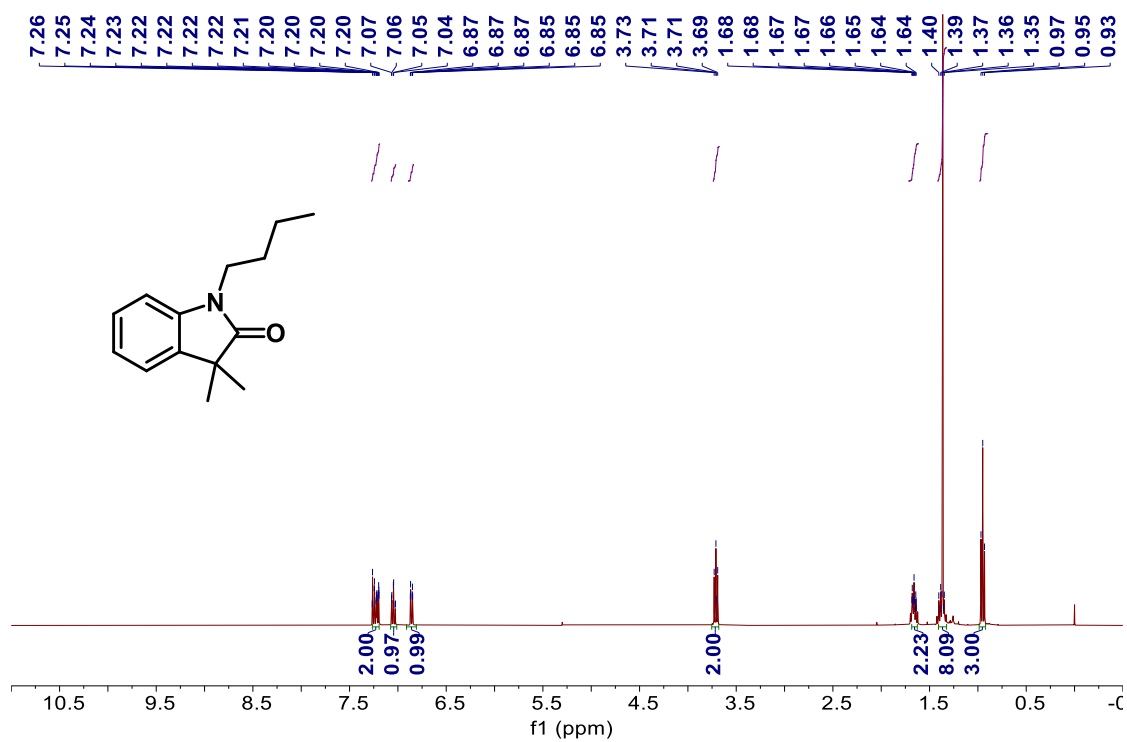

<sup>13</sup>C NMR of compound **15** (101 MHz in CDCl<sub>3</sub>)

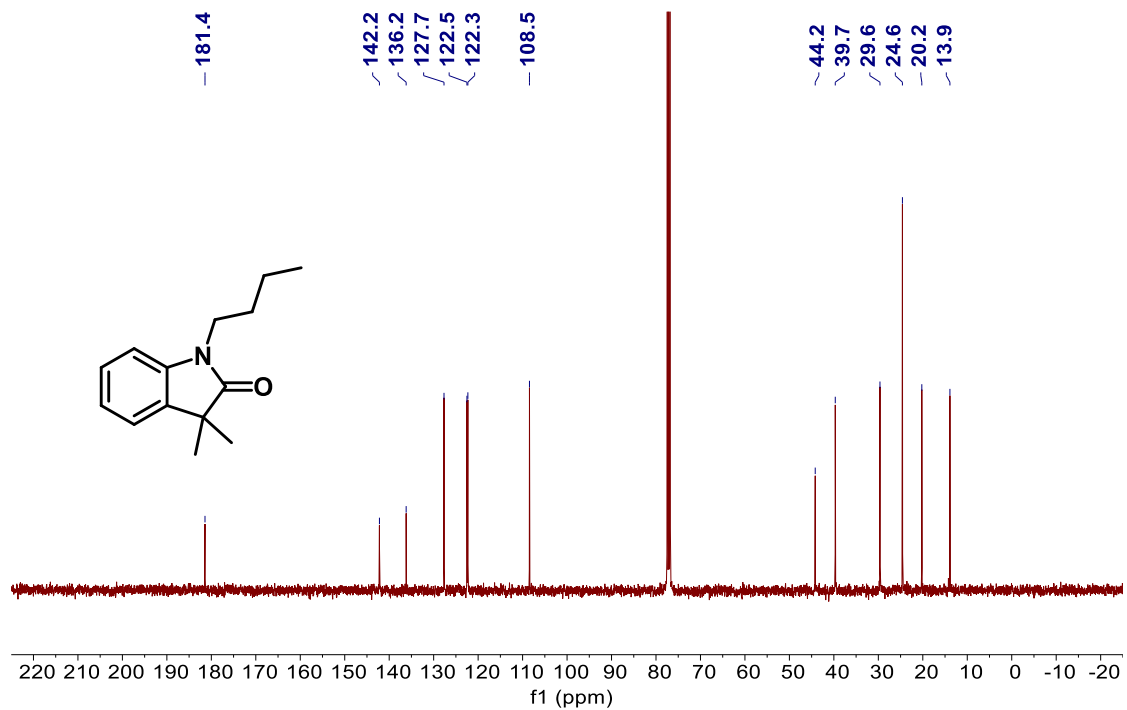

<sup>1</sup>H NMR of compound **16** (400 MHz in CDCl<sub>3</sub>)

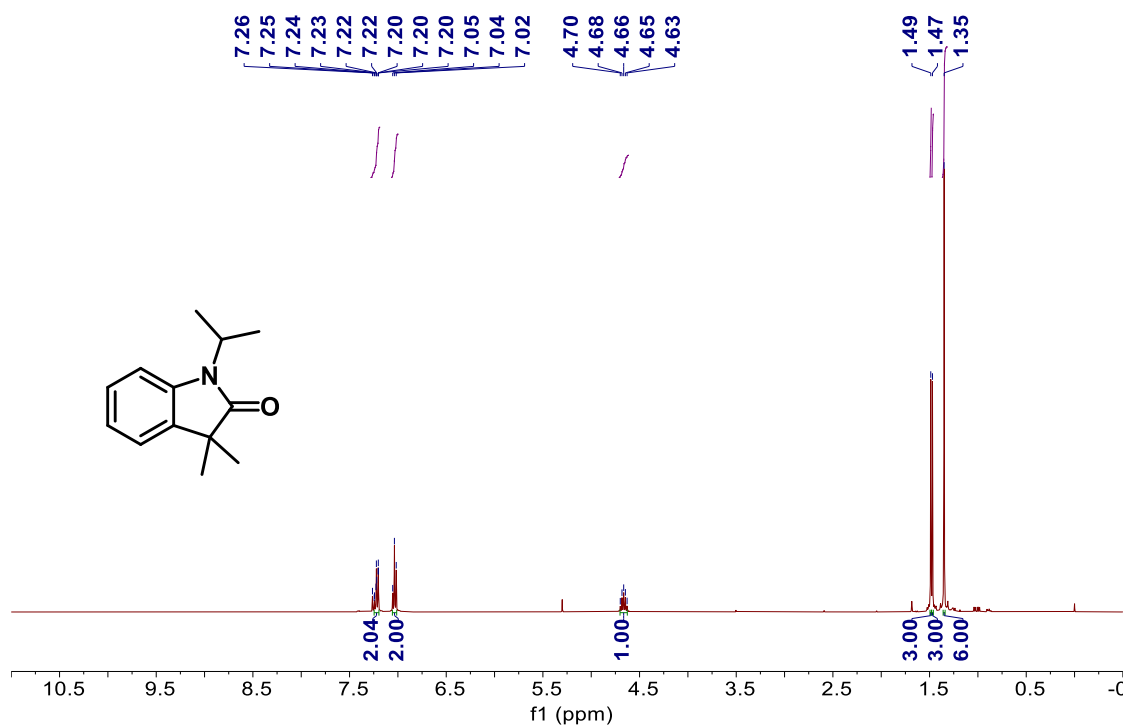

<sup>13</sup>C NMR of compound **16** (101 MHz in CDCl<sub>3</sub>)

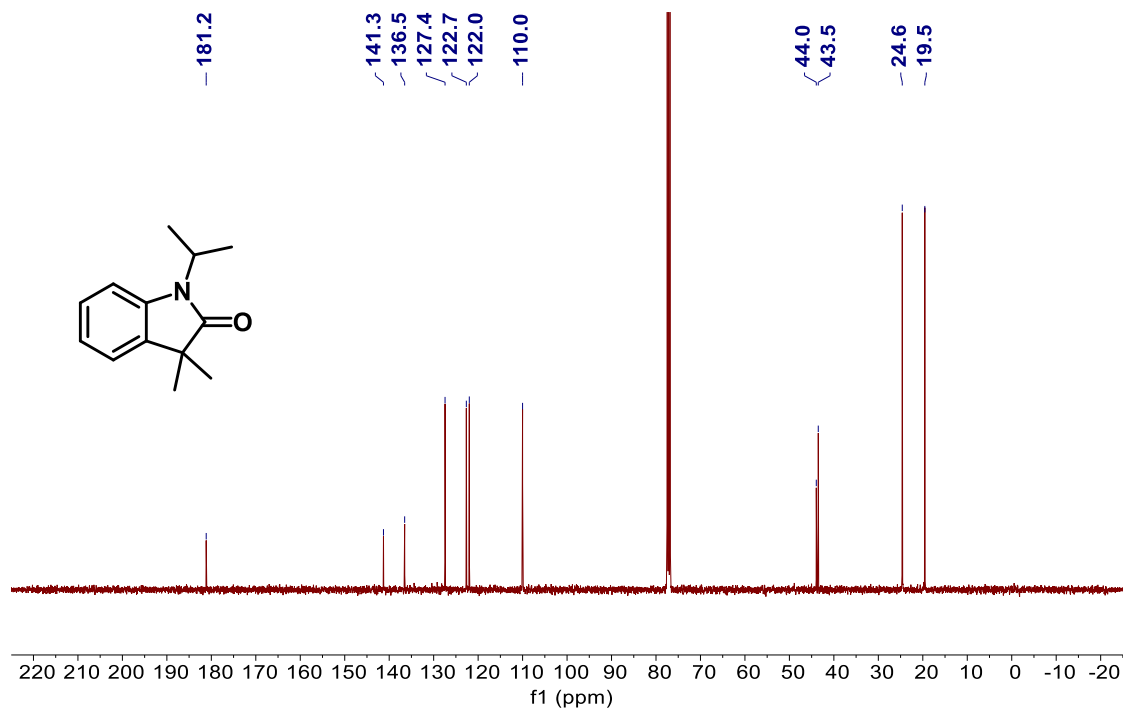

<sup>1</sup>H NMR of compound **17** (400 MHz in CDCl<sub>3</sub>)

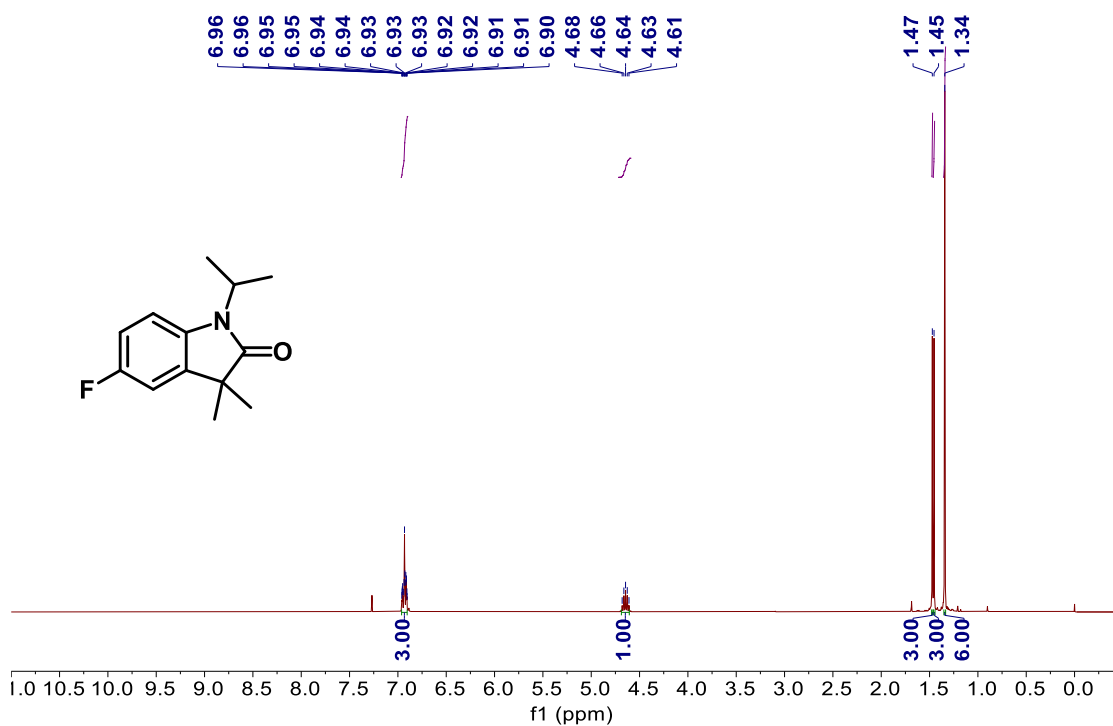

<sup>13</sup>C NMR of compound **17** (101 MHz in CDCl<sub>3</sub>)

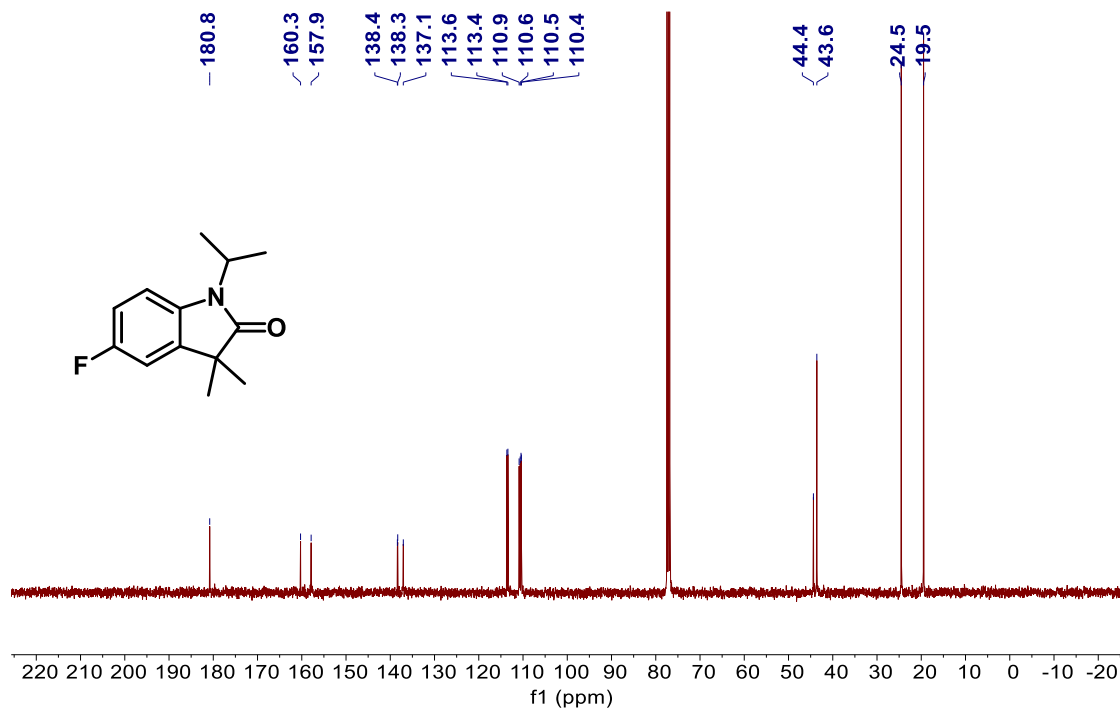

**$^{19}\text{F}$  NMR of compound 17 (101 MHz in  $\text{CDCl}_3$ )**

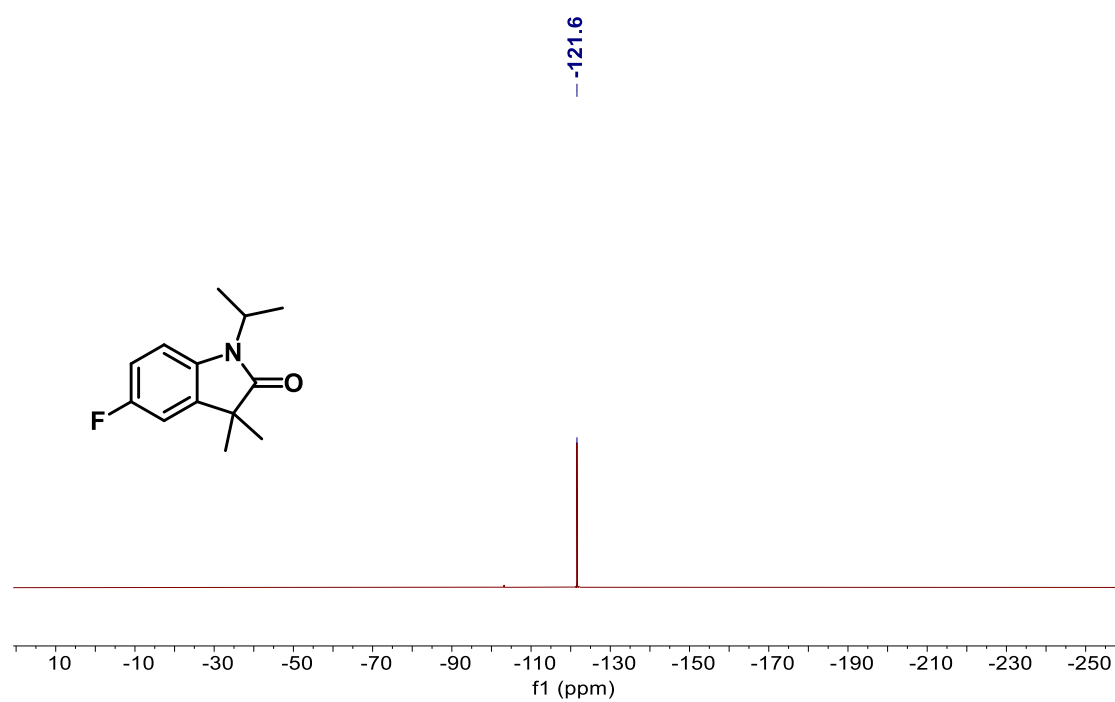

<sup>1</sup>H NMR of compound **18** (400 MHz in CDCl<sub>3</sub>)

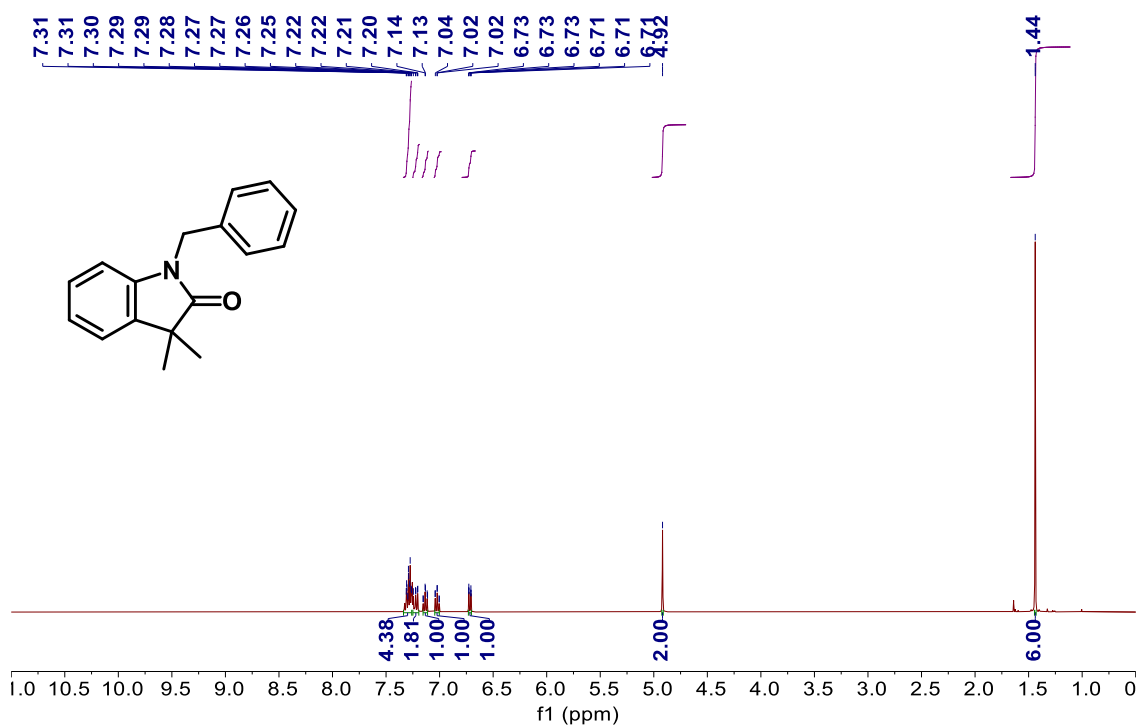

<sup>13</sup>C NMR of compound **18** (101 MHz in CDCl<sub>3</sub>)

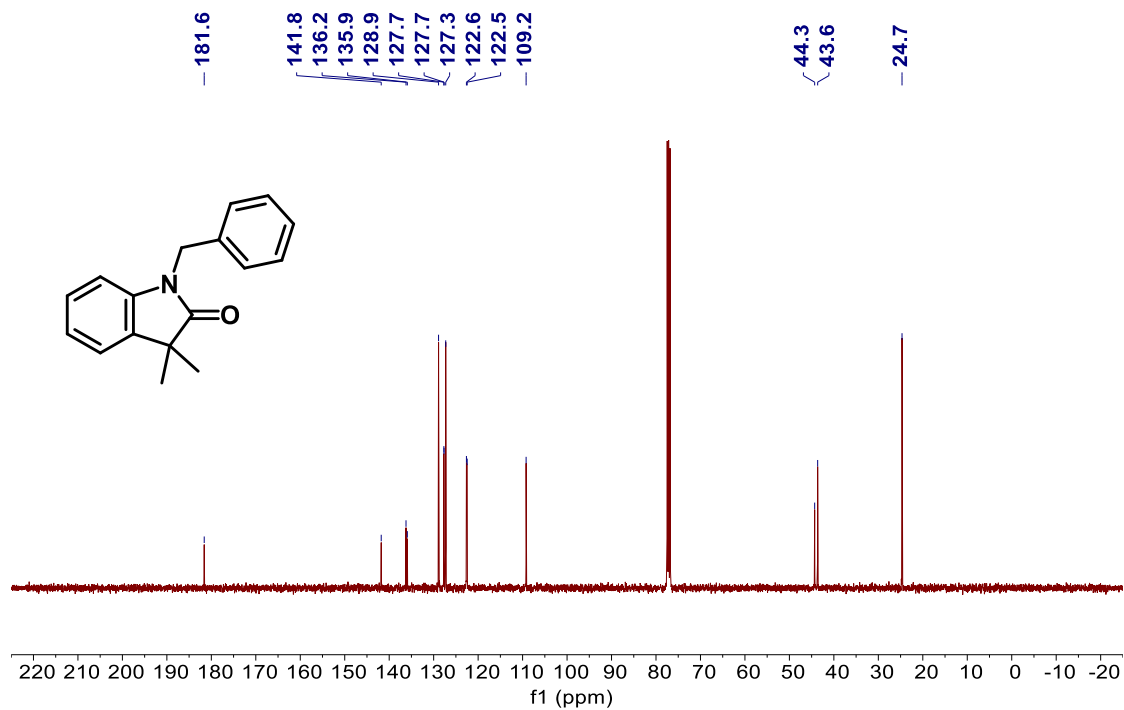



<sup>1</sup>H NMR of compound **19** (400 MHz in CDCl<sub>3</sub>)

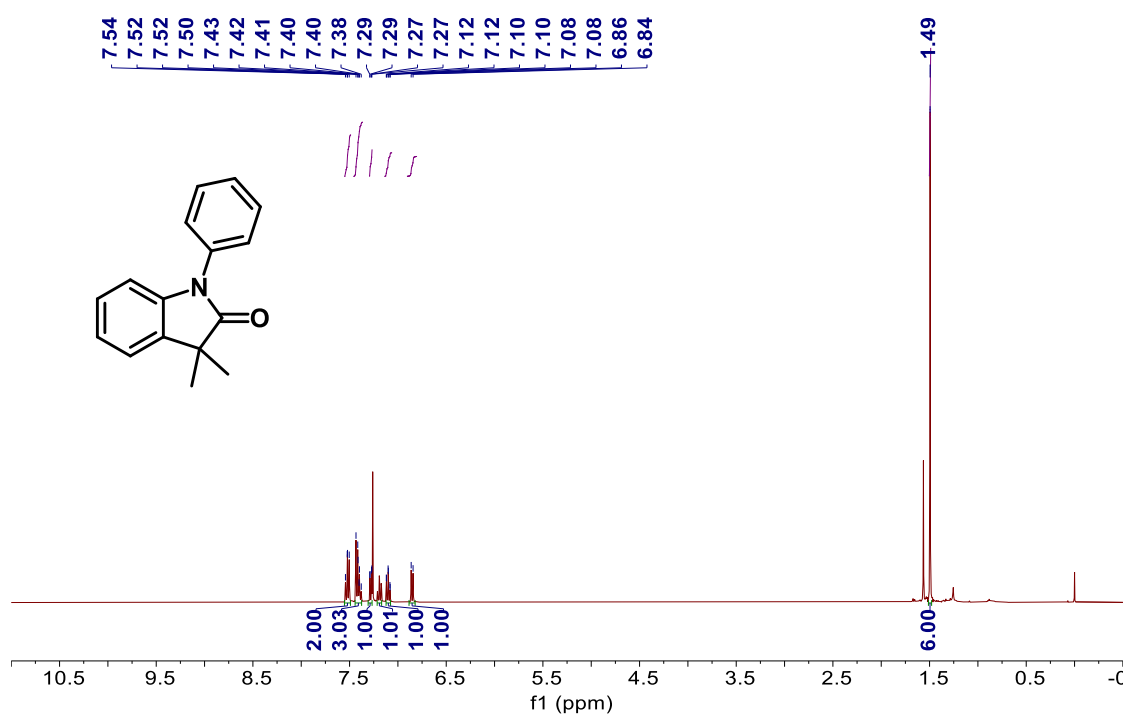

<sup>13</sup>C NMR of compound **19** (101 MHz in CDCl<sub>3</sub>)

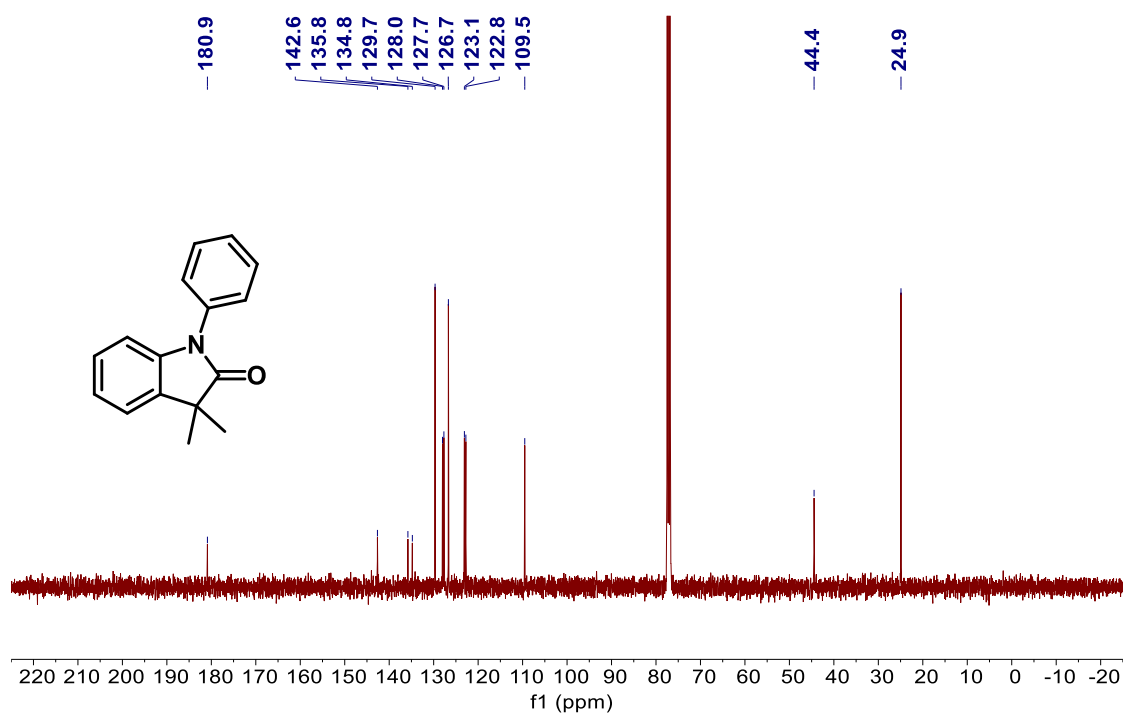

**<sup>1</sup>H NMR of compound 20 (400 MHz in CDCl<sub>3</sub>)**

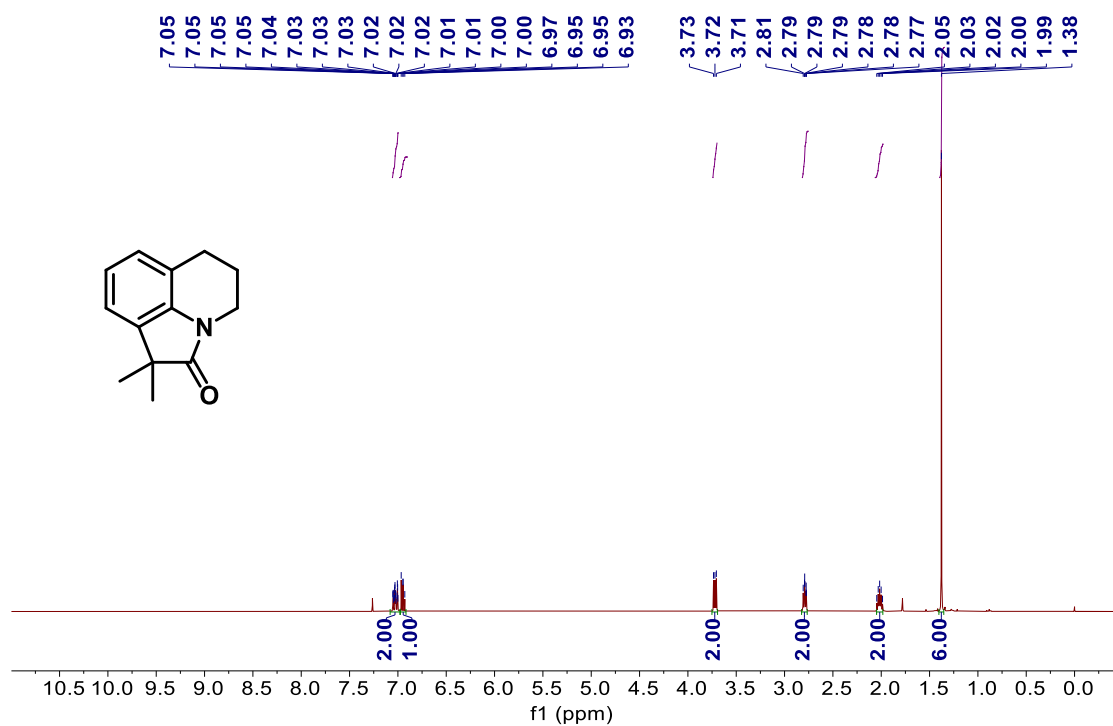

**<sup>13</sup>C NMR of compound 20 (151 MHz in CDCl<sub>3</sub>)**

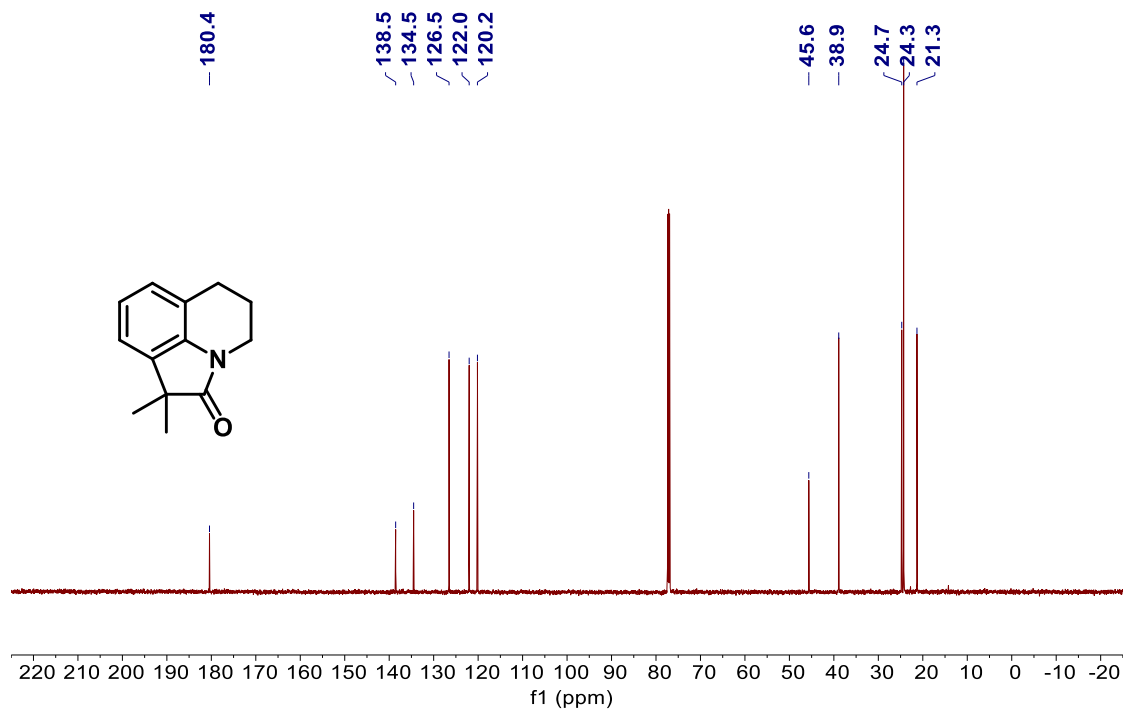

<sup>1</sup>H NMR of compound **21** (400 MHz in CDCl<sub>3</sub>)

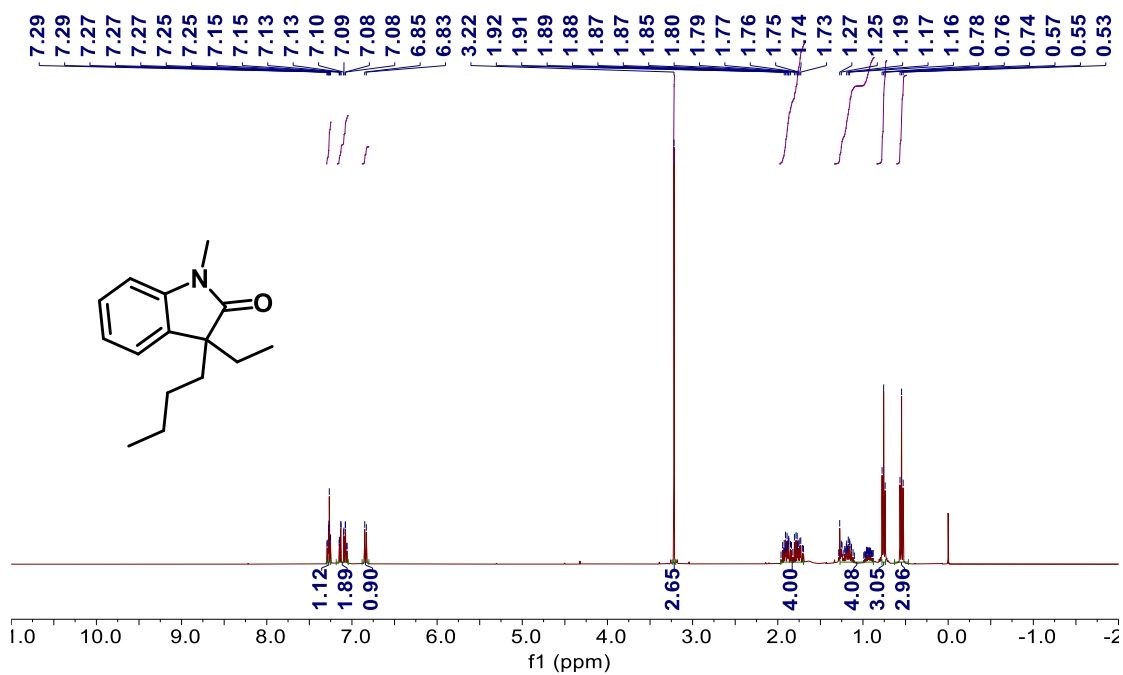

<sup>13</sup>C NMR of compound **21** (101 MHz in CDCl<sub>3</sub>)

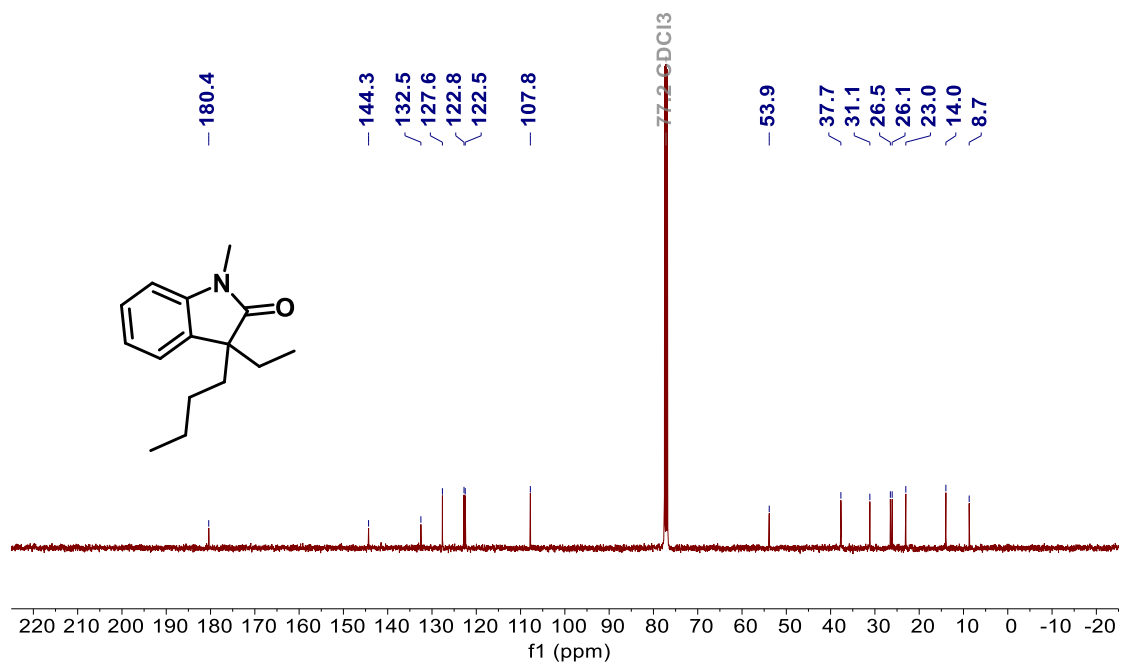

**Chemical Structure of 10:** CC1=CC=C(C=C1)C2(C)C(=O)N2CCOC(=O)C(C)(C)CCCOc3ccc(C)cc3

**<sup>1</sup>H NMR Spectrum Data:**

| Chemical Shift (ppm) | Multiplicity     | Integration                        |
|----------------------|------------------|------------------------------------|
| 6.5 - 7.3            | Aromatic signals | 1.00, 1.00, 1.00, 1.00, 1.00, 1.31 |
| 4.3                  | s                | 2.00                               |
| 3.8                  | m                | 2.00                               |
| 3.4                  | m                | 2.00                               |
| 2.3                  | m                | 3.00                               |
| 1.6                  | m                | 4.00                               |
| 1.1                  | s                | 6.00                               |

Chemical structure of compound 10 is shown above the spectrum. The spectrum displays peaks corresponding to the chemical structure, with the following chemical shifts (ppm) labeled above the peaks:

- 181.5
- 177.8
- 157.0
- 141.9
- 136.5
- 135.9
- 130.4
- 127.7
- 123.6
- 122.7
- 122.6
- 120.8
- 112.0
- 108.5
- 67.8
- 61.4
- 44.1
- 42.1
- 38.9
- 37.0
- 25.1
- 24.5
- 21.5
- 15.9

**<sup>1</sup>H NMR of compound 23 (400 MHz in CDCl<sub>3</sub>)**

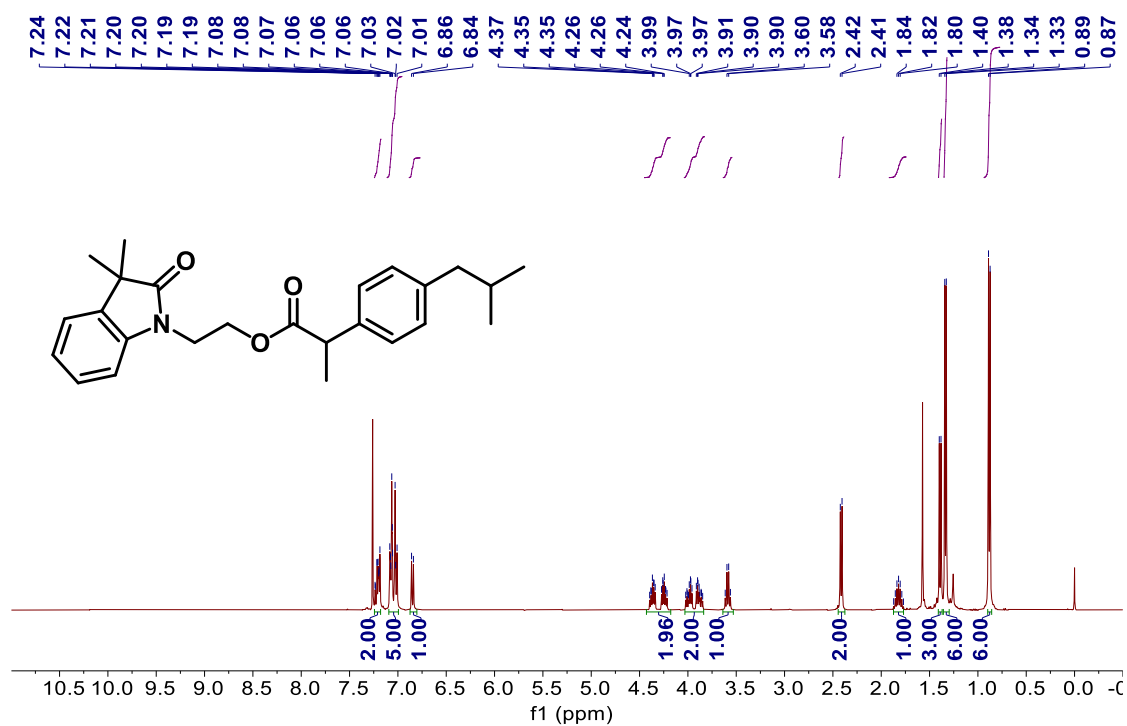

**<sup>13</sup>C NMR of compound 23 (151 MHz in CDCl<sub>3</sub>)**

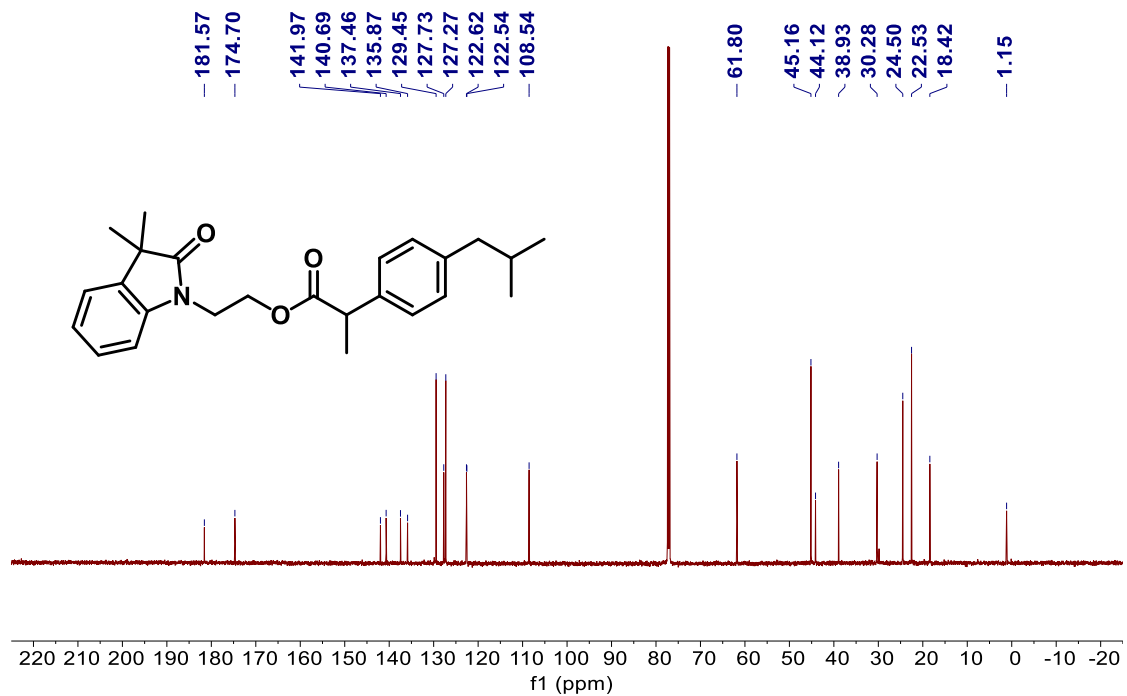

**<sup>1</sup>H NMR of compound 24 (400 MHz in CDCl<sub>3</sub>)**

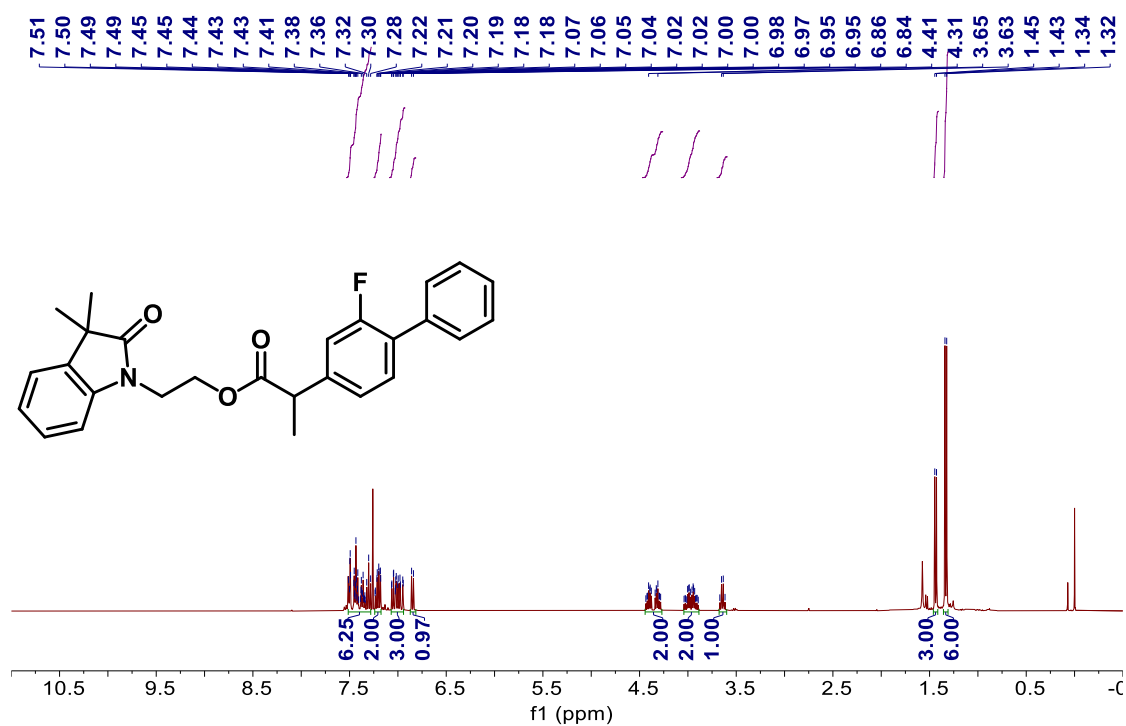

**<sup>13</sup>C NMR of compound 24 (101 MHz in CDCl<sub>3</sub>)**

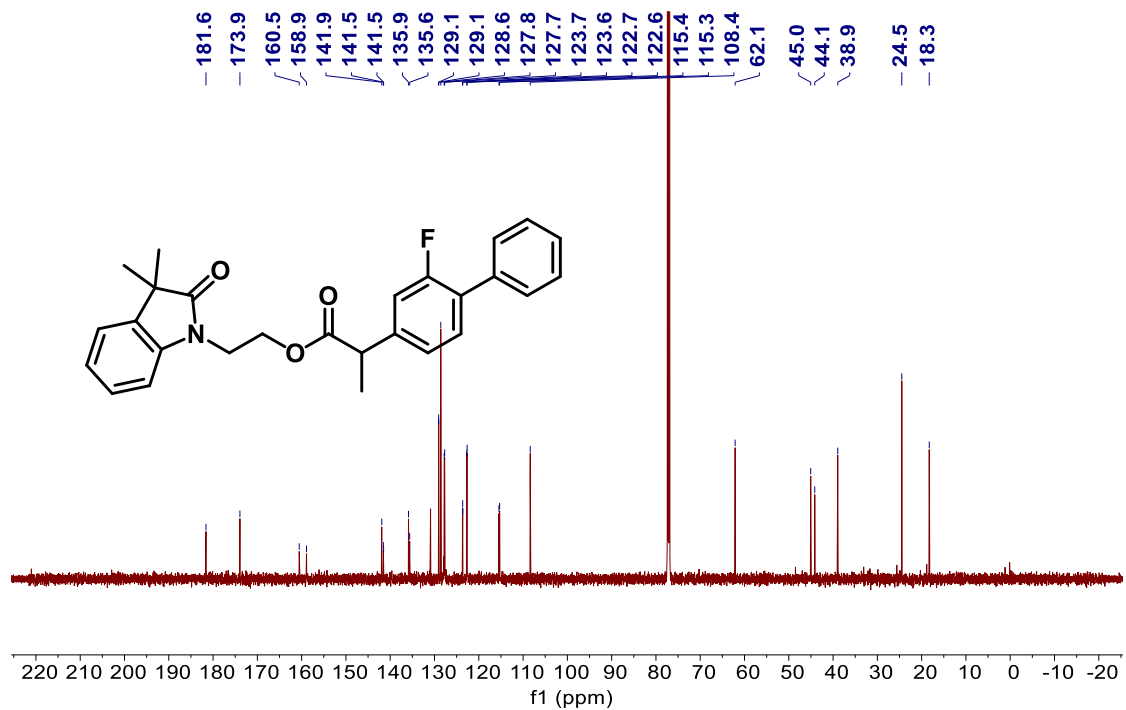

**<sup>19</sup>F NMR** of compound **24** (376 MHz in CDCl<sub>3</sub>)

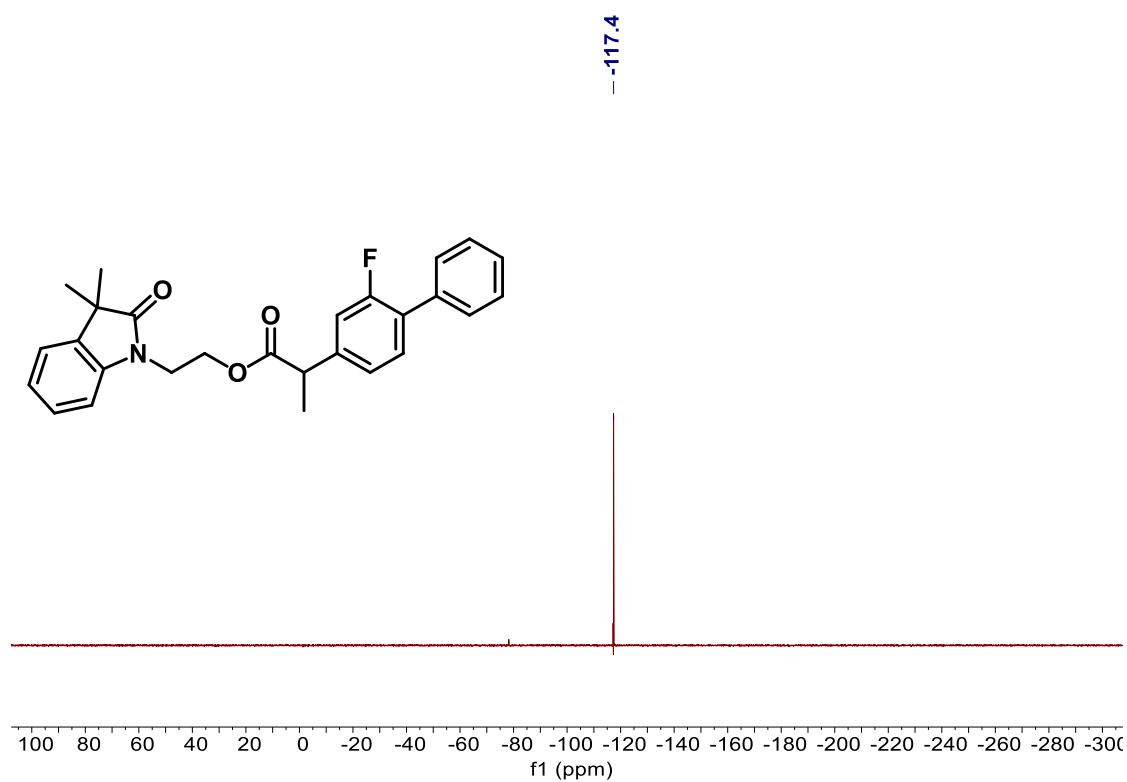

## 6. References.

- (1) Ayitou, A. J.-L.; Sivaguru, J. Reactive spin state dependent enantiospecific photocyclization of axially chiral  $\alpha$ -substituted acrylanilides. *Chem. Commun.* **2011**, *47*, 2568-2570.
- (2) (Boess, E.; Karanestora, S.; Bosnidou, A.-E.; Schweitzer-Chaput, B.; Hasenbeck, M.; Klussmann, M. Synthesis of Oxindoles by Brønsted Acid Catalyzed Radical Cascade Addition of Ketones. *Synlett* **2015**, *26*, 1973-1976.
- (3) Ding, S.; Ren, H.; Zhu, M.; Ma, Q.; Miao, Z.; Li, P. Silver(I)-mediated oxidation/cyclization of acrylamides with alkyl trifluoroborates. *Synth. Commun.* **2021**, *51*, 593-600..
- (4) Zhao, J.; Li, P.; Xu, Y.; Shi, Y.; Li, F. Nickel-Catalyzed Transformation of Diazoacetates to Alkyl Radicals Using Alcohol as a Hydrogen Source. *Org. Lett.* **2019**, *21*, 9386-9390..
- (5) Tang, X.-J.; Dolbier Jr., W. R. Efficient Cu-catalyzed Atom Transfer Radical Addition Reactions of Fluoroalkylsulfonyl Chlorides with Electron-deficient Alkenes Induced by Visible Light. *Angew. Chem. Int. Ed.* **2015**, *54*, 4246-4249.
- (6) Fan, X.; Lei, T.; Chen, B.; Tung, C.-H.; Wu, L.-Z. Photocatalytic C-C Bond Activation of Oxime Ester for Acyl Radical Generation and Application. *Org. Lett.* **2019**, *21*, 4153-4158.
- (7) Kilaru, P.; Acharya, S. P.; Zhao, P. A Tethering Directing Group Strategy for Ruthenium-Catalyzed Intramolecular Alkene Hydroarylation. *Chem. Commun.* **2018**, *54*, 924-927.
- (8) Ratushnyy, M.; Kvasovs, N.; Sarkar, S.; Gevorgyan, V., Visible-Light-Induced Palladium-Catalyzed Generation of Aryl Radicals from Aryl Triflates. *Angew. Chem. Int. Ed.* **2020**, *59*, 10316-10320.
- (9) Cao A.Z , Xiao Y. T., Wu Y. C. ,Wu, Song R. J. S., Xie Y. X. and Li J.H.,Copper-catalyzed C-H [3 + 2] annulation of N-substituted anilines with  $\alpha$ -carbonyl alkyl bromides via C(sp<sup>3</sup>)-Br/C(sp<sup>2</sup>)-H functionalization. *Org. Biomol. Chem.*, **2020**, *18*, 2170-2174.
- (10) Chen, J.-Q.; Wei, Y.-L.; Xu, G.-Q.; Liang, Y.-M.; Xu, P.-F. Intramolecular 1,5-H transfer reaction of aryl iodides through visible-light photoredox catalysis: a concise method for the synthesis of the natural product scaffolds. *Chem. Commun.* **2016**, *52*, 6455-6458.
- (11) Lu K.; Han X. W.; Yao W. W.; Luan Y.-X.; Wang Y. X.; Chen H.; Xu X. T.; Zhang K.; Ye M.; DMF-Promoted Redox-Neutral Ni-Catalyzed Intramolecular Hydroarylation of Alkene with Simple Arene *ACS Catal.*, **2018**, *8*, 3913-3917.
- (12) Liu C.; Liu D.; Zhang W.; Zhou L. L.;and Lei A. E.W.;Nickel-Catalyzed Aromatic C-H Alkylation with Secondary or Tertiary Alkyl-Bromine Bonds for the Construction of Indolones. *Org. Lett.***2013**, *15*, *24*, 6166-6169.
- (13) Lv H.G., Xu X. Y.; Li J.; Huang X. B.; Fang G. Y.; and Zheng L. F.; Mechanochemical Divergent Syntheses of Oxindoles and  $\alpha$ -Arylacrylamides via Controllable Construction of C C and C-N Bonds by Copper and Piezoelectric Materials. *Angew. Chem. Int. Ed.* **2022**, *61*, e202206420.



(14) Chen J.Q.; Wei Y.L.; Xu G.Q.; Liang Y.M. and Xu P.F.; Intramolecular 1,5-H transfer reaction of aryl iodides through visible-light photoredox catalysis: a concise method for the synthesis of natural product scaffolds. *Chem. Commun.*, **2016**, 52, 6455-6458
